# Supplementary material for: Sarcoehrenbergilides D–F: cytotoxic cembrene diterpenoids from the soft coral Sarcophyton ehrenbergi
Source: Royal Society of Chemistry journal article supplement (doi:10.1039/c9ra04158c), 2019-01-01
Supplement: c9ra04158c1.pdf [file c9ra04158c1.pdf]

## Supplementary Materials

### Sarcoehrenbergilides D-F: Cytotoxic Cembrene Diterpenoids from the Soft Coral *Sarcophyton ehrenbergi*

Mohamed-Elamir F. Hegazy<sup>1,2</sup>, Tarik A. Mohamed<sup>2</sup>, Abdelsamed I. Elshamy<sup>3,4</sup>, Ahmed R. Hamed<sup>2</sup>, Mahmoud A. A. Ibrahim<sup>5</sup>, Shinji Ohta<sup>6</sup>, Akemi Umeyama<sup>4</sup>, Paul W. Paré<sup>7\*</sup>, and Thomas Efferth<sup>1\*</sup>

<sup>1</sup> Department of Pharmaceutical Biology, Institute of Pharmacy and Biochemistry, Johannes Gutenberg University, Staudinger Weg 5, 55128 Mainz, Germany

<sup>2</sup> Chemistry of Medicinal Plants Department, National Research Centre, El-Tahrir St., Dokki, Giza 12622, Egypt; E-Mail: elamir77@live.com; tarik.nrc83@yahoo.com; n1ragab2004@yahoo.com

<sup>3</sup> Natural Compound Chemistry Department, National Research Centre, El-Tahrir St., Dokki, Giza 12622, Egypt; E-Mail: elshamynrc@yahoo.com

<sup>4</sup> Faculty of Pharmaceutical Sciences, Tokushima Bunri University, Yamashiro-cho, Tokushima, 770-8514, Japan E-Mail: umeyama@ph.bunri-u.ac.jp

<sup>5</sup> Computational Chemistry Laboratory, Chemistry Department, Faculty of Science, Minia University, Minia 61519, Egypt; E-Mail: m.ibrahim@compchem.net

<sup>6</sup> Graduate School of Biosphere Science, Hiroshima University, 1-7-1 Kagamiyama, Higashi-Hiroshima 739-8521, Japan; E-Mail: ohta@hiroshima-u.ac.jp

<sup>7</sup> Department of Chemistry and Biochemistry, Texas Tech University, Lubbock, TX 79409, USA

| Supporting data                                                 | Page |
|-----------------------------------------------------------------|------|
| <b>S1:</b> FTIR of <b>1</b> .....                               | 3    |
| <b>S2:</b> LREIMS of <b>1</b> .....                             | 4    |
| <b>S3:</b> HREIMS of <b>1</b> .....                             | 5    |
| <b>S4:</b> <sup>1</sup> H NMR of <b>1</b> .....                 | 6    |
| <b>S5:</b> <sup>13</sup> C NMR of <b>1</b> .....                | 7    |
| <b>S6:</b> DEPT-135 of <b>1</b> .....                           | 8    |
| <b>S7:</b> HSQC of <b>1</b> .....                               | 9    |
| <b>S8:</b> HMBC of <b>1</b> .....                               | 10   |
| <b>S9:</b> <sup>1</sup> H <sup>1</sup> H COSY of <b>1</b> ..... | 11   |
| <b>S10:</b> NOESY of <b>1</b> .....                             | 12   |
| <b>S11:</b> FTIR of <b>2</b> .....                              | 13   |
| <b>S12:</b> LREIMS of <b>2</b> .....                            | 14   |
| <b>S13:</b> HREIMS of <b>2</b> .....                            | 15   |
| <b>S14:</b> <sup>1</sup> H NMR of <b>2</b> .....                | 16   |
| <b>S15:</b> <sup>13</sup> C NMR of <b>2</b> .....               | 17   |
| <b>S16:</b> DEPT-135 of <b>2</b> .....                          | 18   |

|                                                                  |    |
|------------------------------------------------------------------|----|
| <b>S17:</b> HSQC of <b>2</b> .....                               | 19 |
| <b>S18:</b> HMBC of <b>2</b> .....                               | 20 |
| <b>S19:</b> <sup>1</sup> H <sup>1</sup> H COSY of <b>2</b> ..... | 21 |
| <b>S20:</b> NOESY of <b>2</b> .....                              | 22 |
| <b>S21:</b> FT-IR of <b>3</b> .....                              | 23 |
| <b>S22:</b> LREIMS of <b>3</b> .....                             | 24 |
| <b>S23:</b> HREIMS of <b>3</b> .....                             | 25 |
| <b>S24:</b> <sup>1</sup> H NMR of <b>3</b> .....                 | 26 |
| <b>S25:</b> <sup>13</sup> C NMR of <b>3</b> .....                | 27 |
| <b>S26:</b> DEPT-135 of <b>3</b> .....                           | 28 |
| <b>S27:</b> HSQC of <b>3</b> .....                               | 29 |
| <b>S28:</b> HMBC of <b>3</b> .....                               | 30 |
| <b>S29:</b> <sup>1</sup> H <sup>1</sup> H COSY of <b>3</b> ..... | 31 |
| <b>S30:</b> NOESY of <b>3</b> .....                              | 32 |

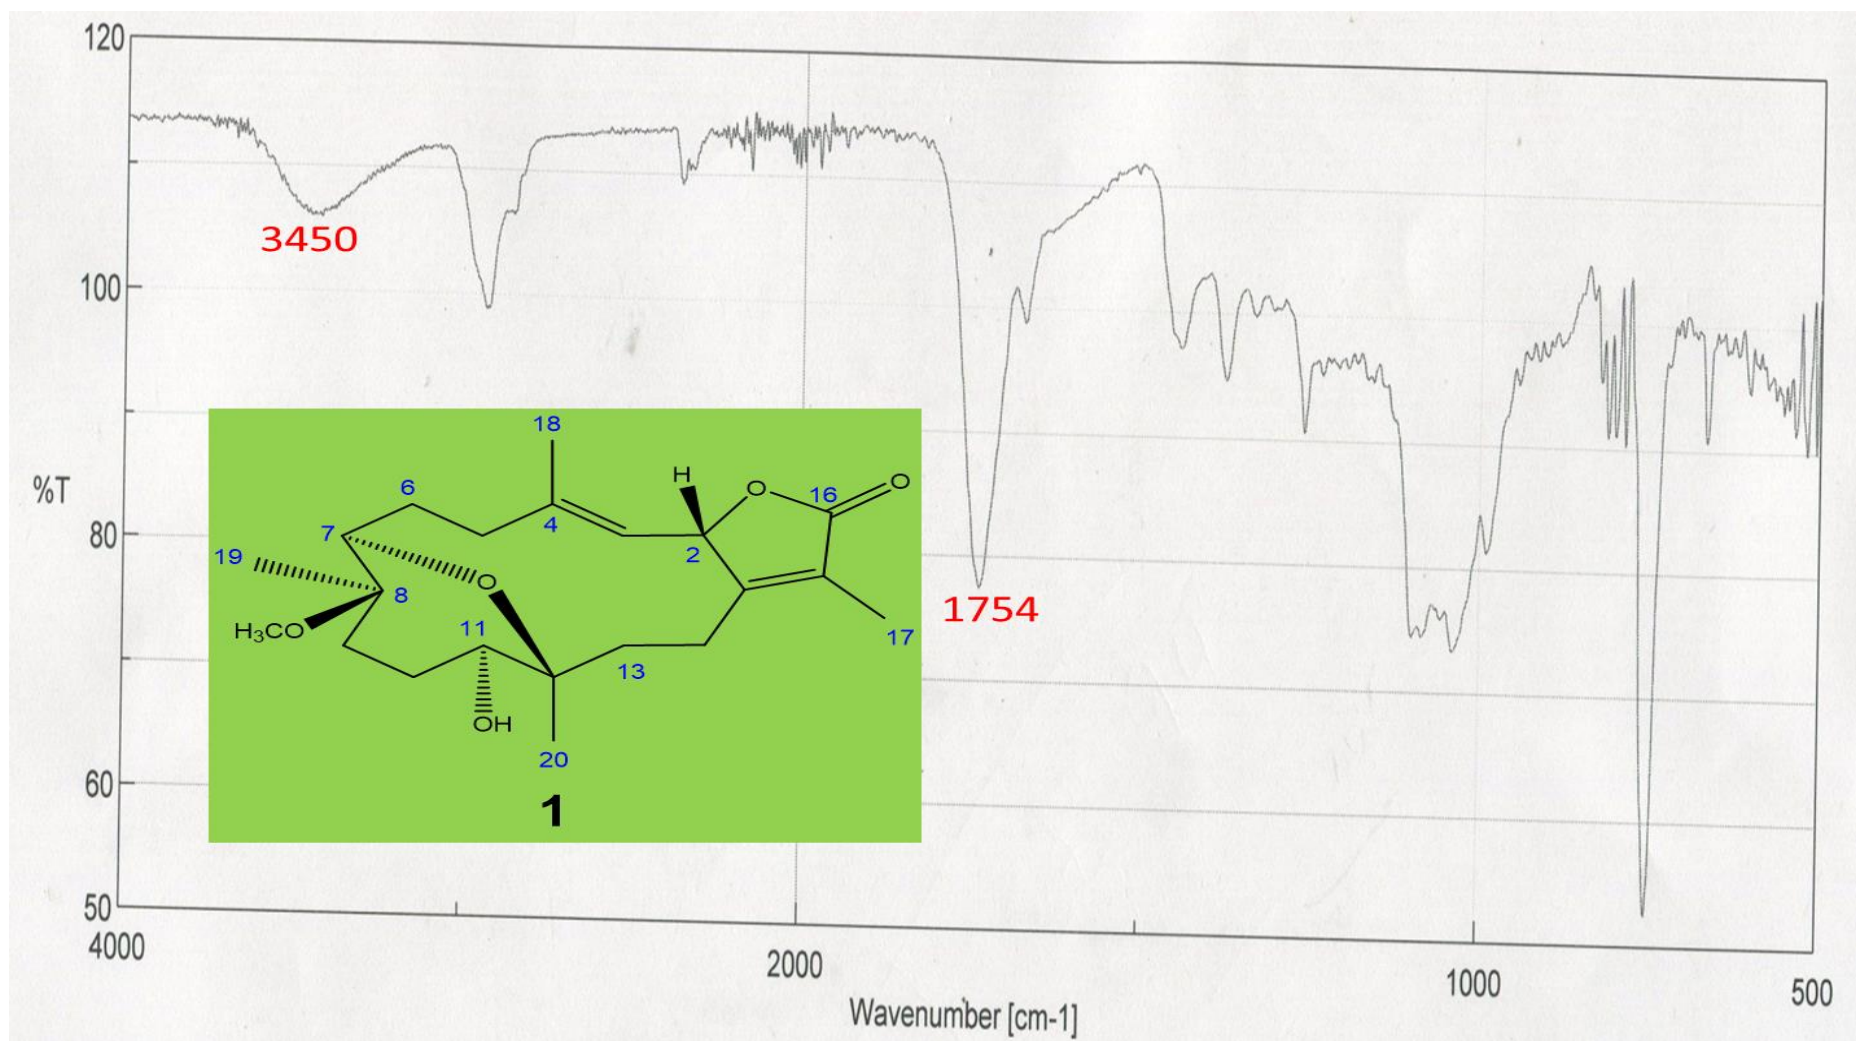

S1: FT-IR of 1

[ Mass Spectrum ]  
 Data : Umeyama-EI.07-Sep-2016.009      Date : 07-Sep-2016 11:06  
 Sample : SE-70  
 Note : MStation  
 Inlet : Direct      Ion Mode : EI+  
 Spectrum Type : Normal Ion [MF-Linear]  
 RT : 1.14 min      Scan# : 35  
 BP : m/z 85      Int. : 716.58 (7513856)  
 Output m/z range : 35 to 500      Cut Level : 0.00 %

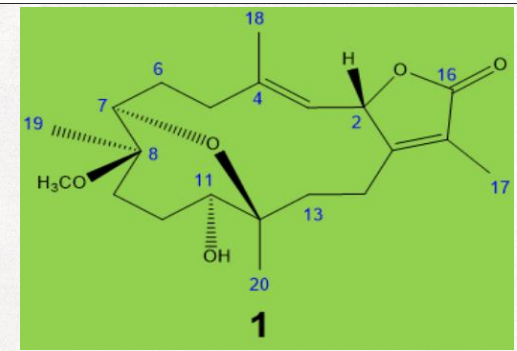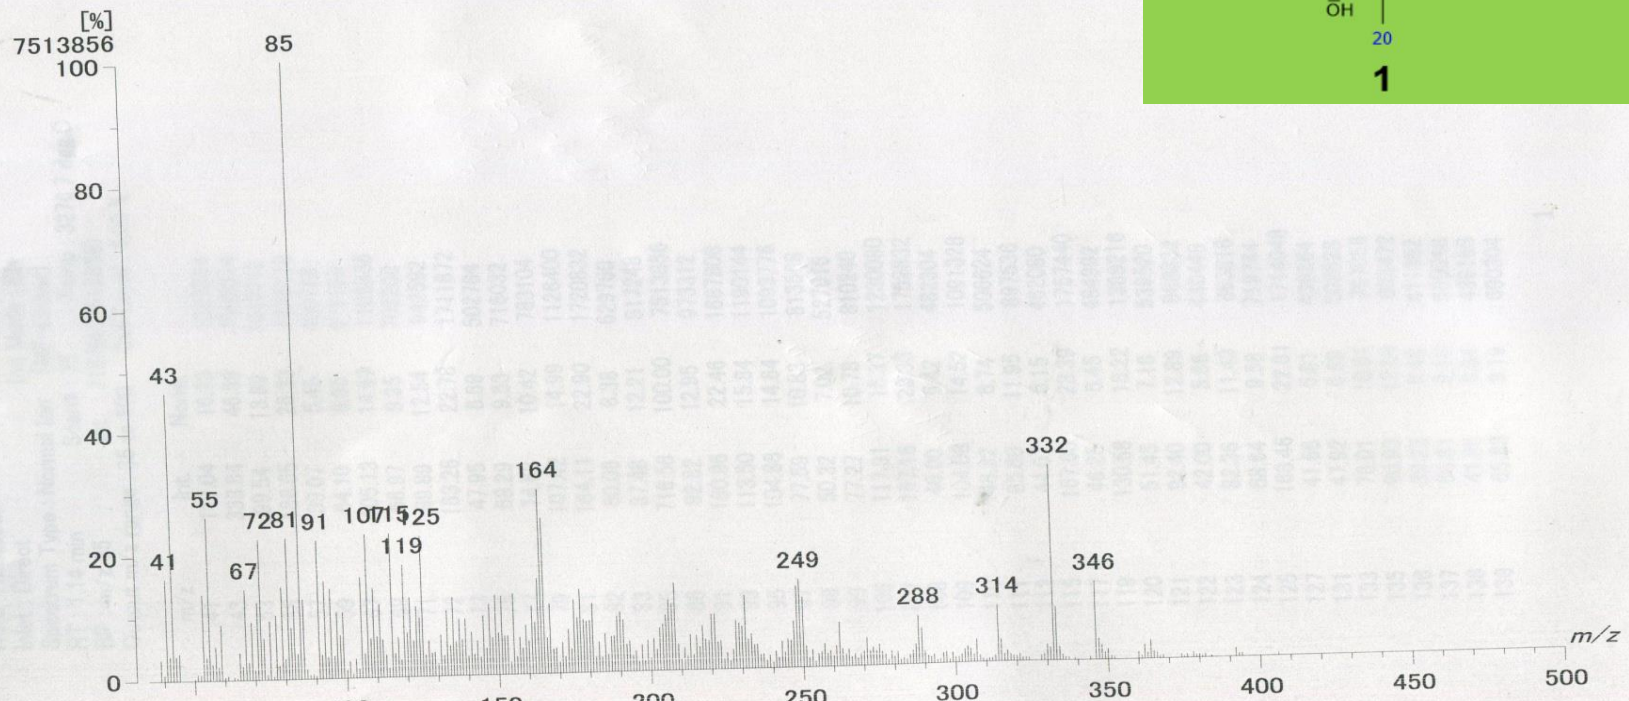

S2: LREIMS of 1



Data : Umeyama-EIHR.07-Sep-2016.005

Date : 07-Sep-2016 15:18

Instrument : MS700D

Sample : SE--70

Note : MStation

Inlet : Direct Ion Mode : EI+

RT : 1.24 min Scan# : 32

Elements : C 150/0, H 250/0, O 50/0

Mass Tolerance : 5mmu

Unsaturation (U.S.) : 0.0 - 15.0

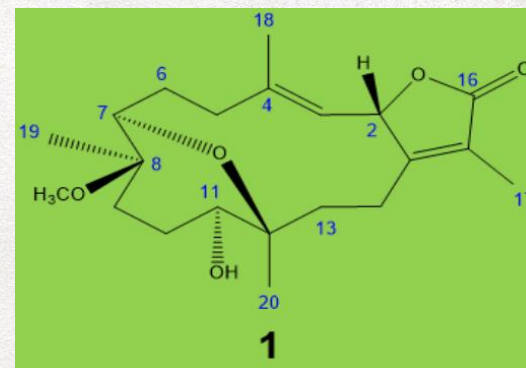

|   | Observed m/z | Int%  | Err [ppm / mmu] | U.S. Composition |
|---|--------------|-------|-----------------|------------------|
| 1 | 332.2002     | 17.70 | +4.3 / +1.4     | 7.0 C20 H28 O4   |
| 2 | 346.2127     | 8.01  | -4.9 / -1.7     | 7.0 C21 H30 O4   |

S3: HREIMS of 1

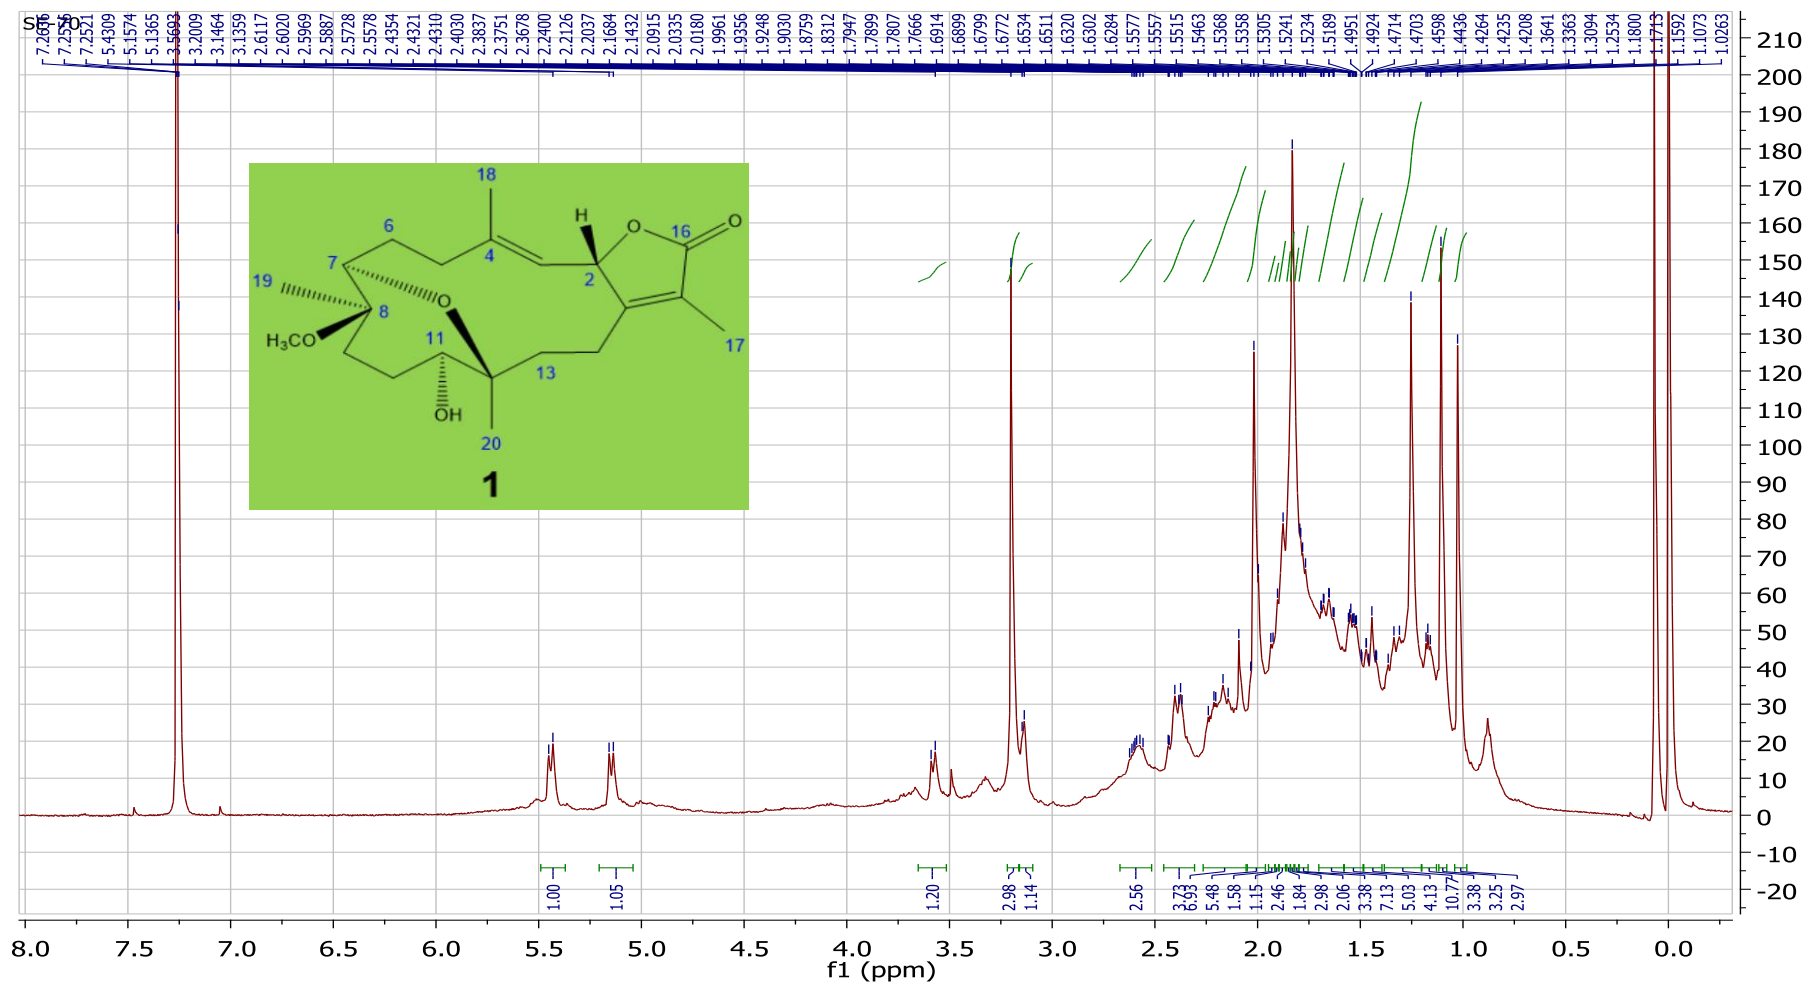

**S4:** <sup>1</sup>H NMR of **1**

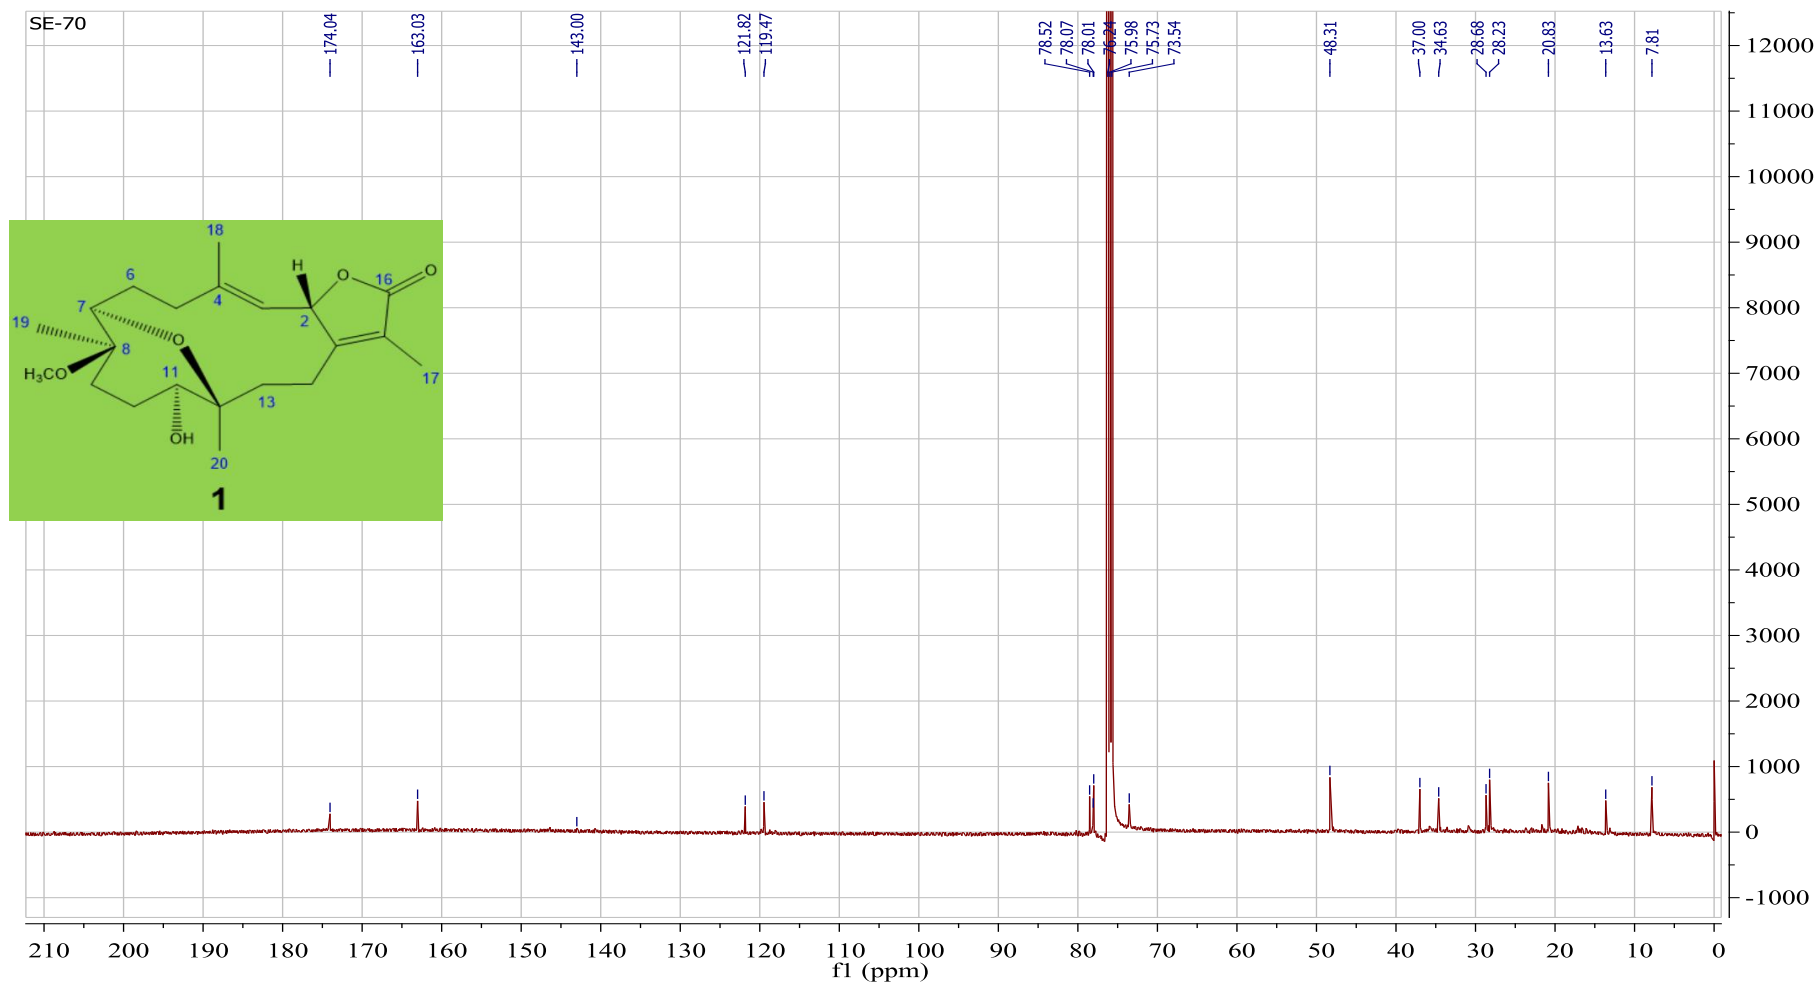

S5:  $^{13}\text{C}$  NMR of **1**

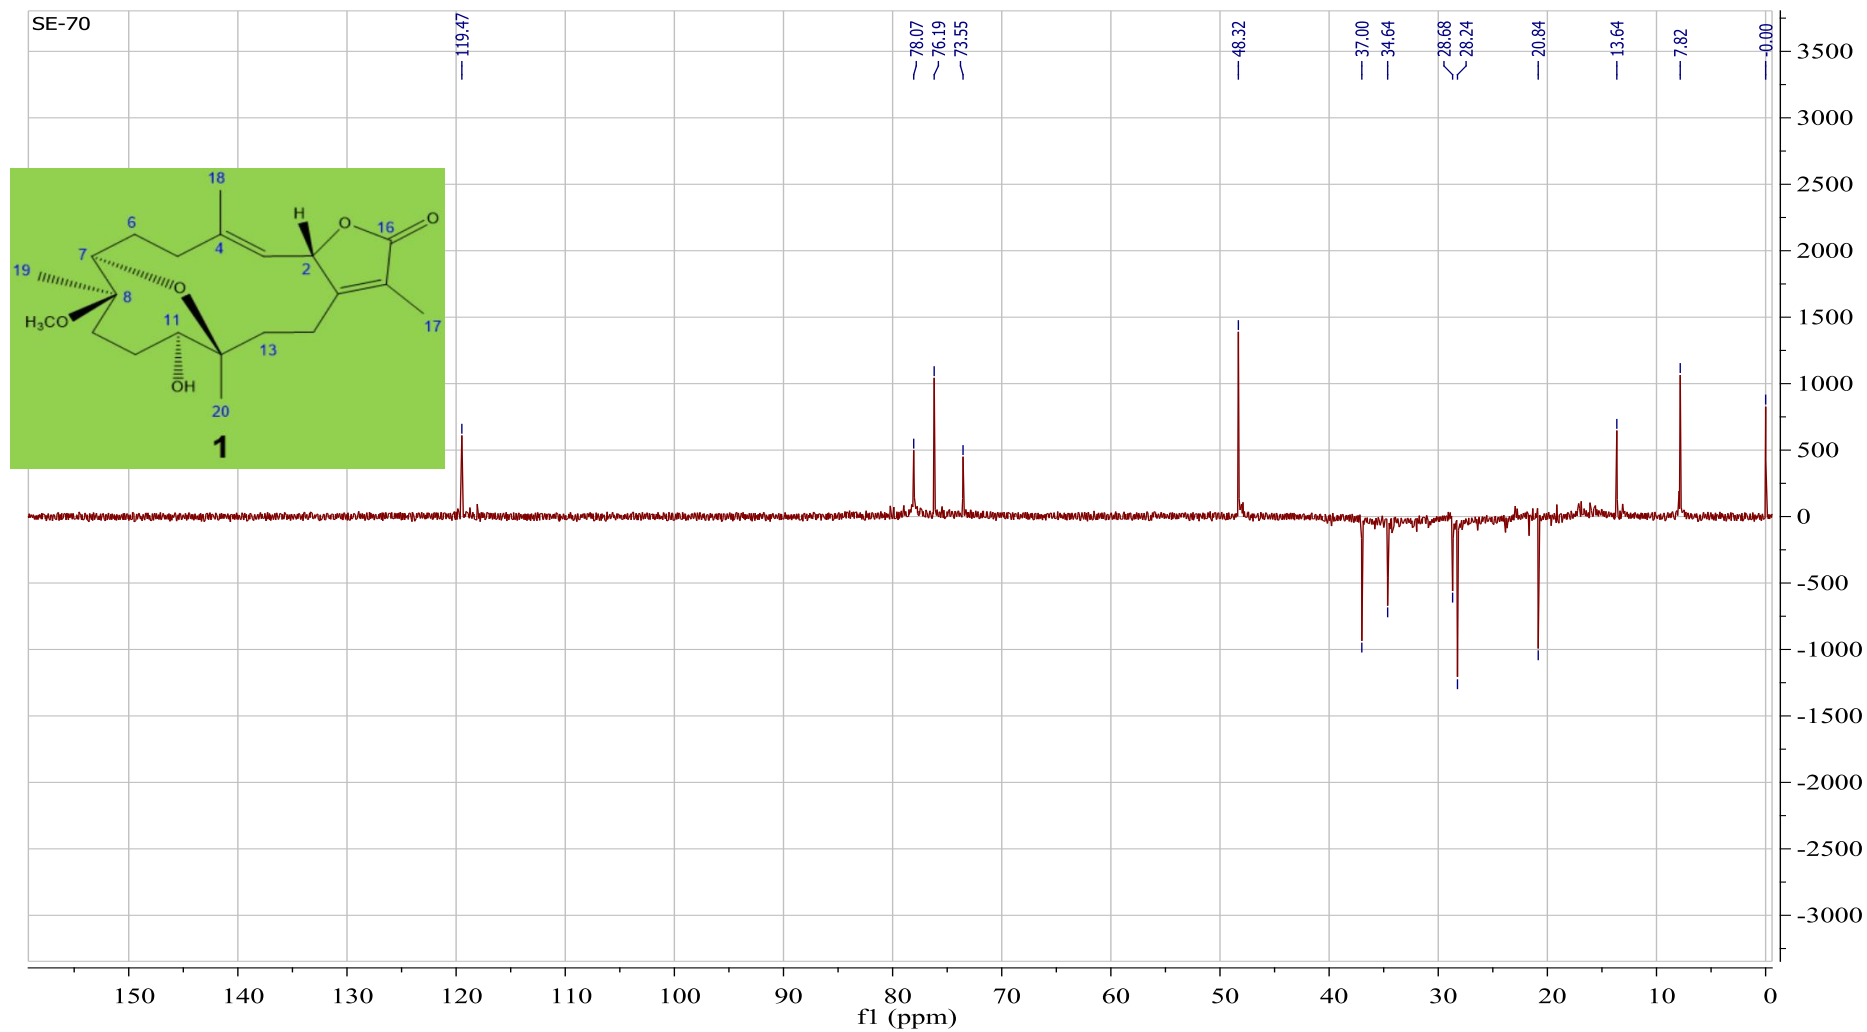

S6: DEPT-135 of **1**



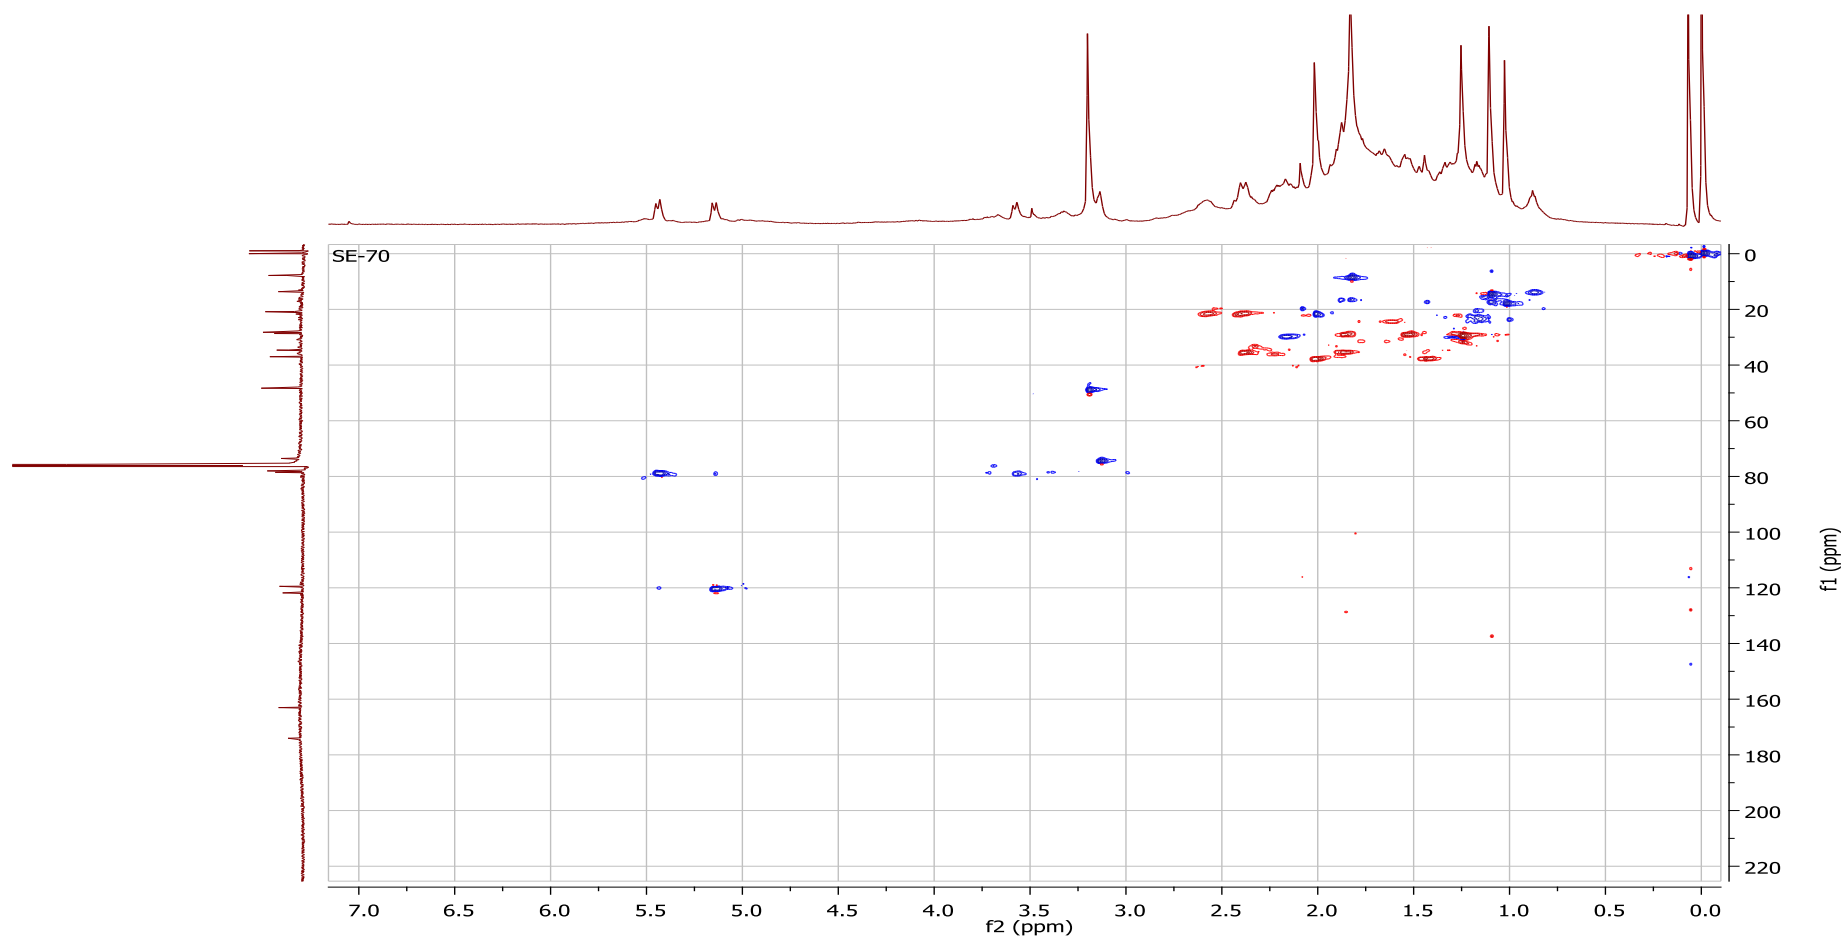

S7: HSQC of 1

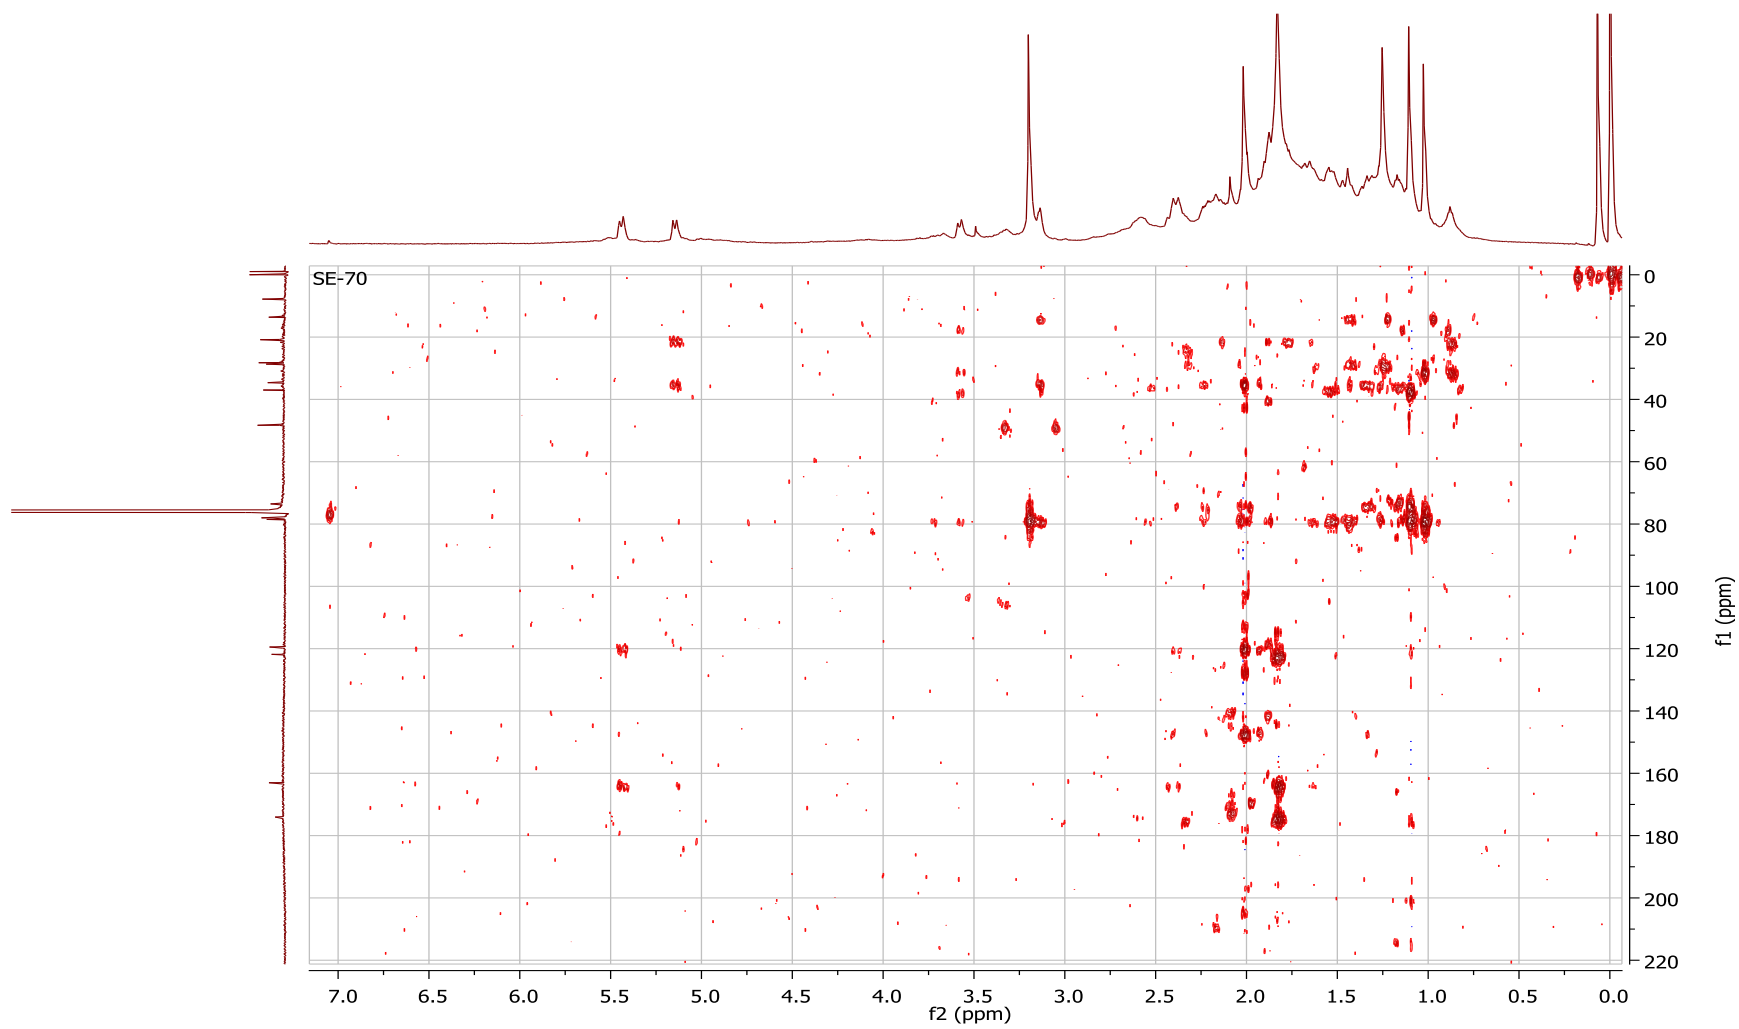

S8: HMBC of 1

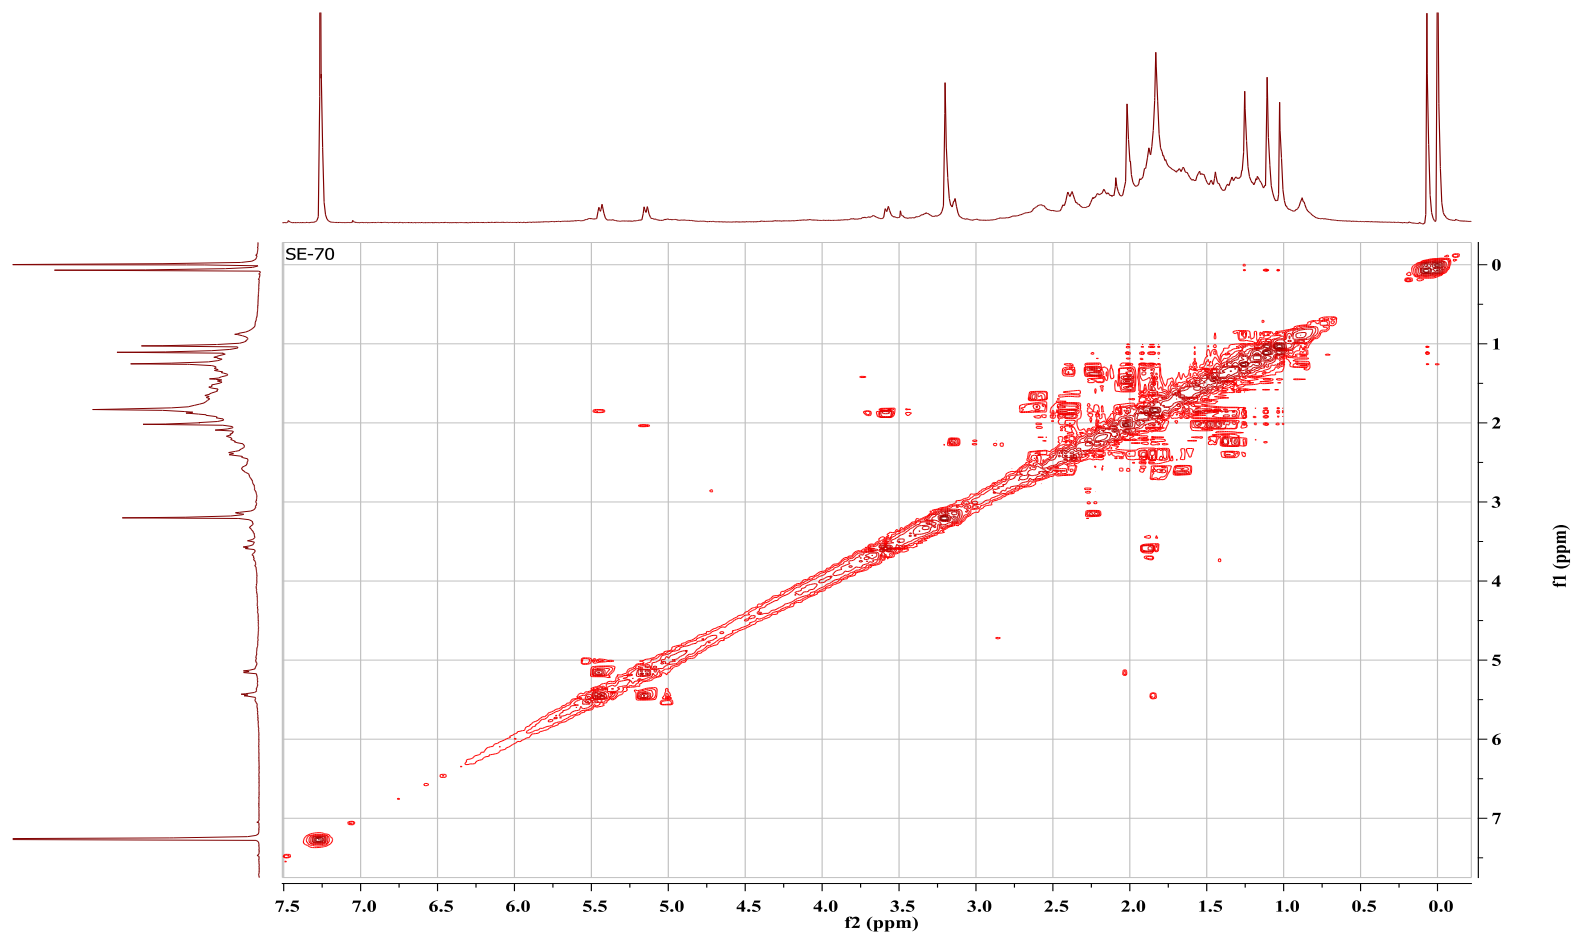

S9:  $^1\text{H}$   $^1\text{H}$  COSY of **1**

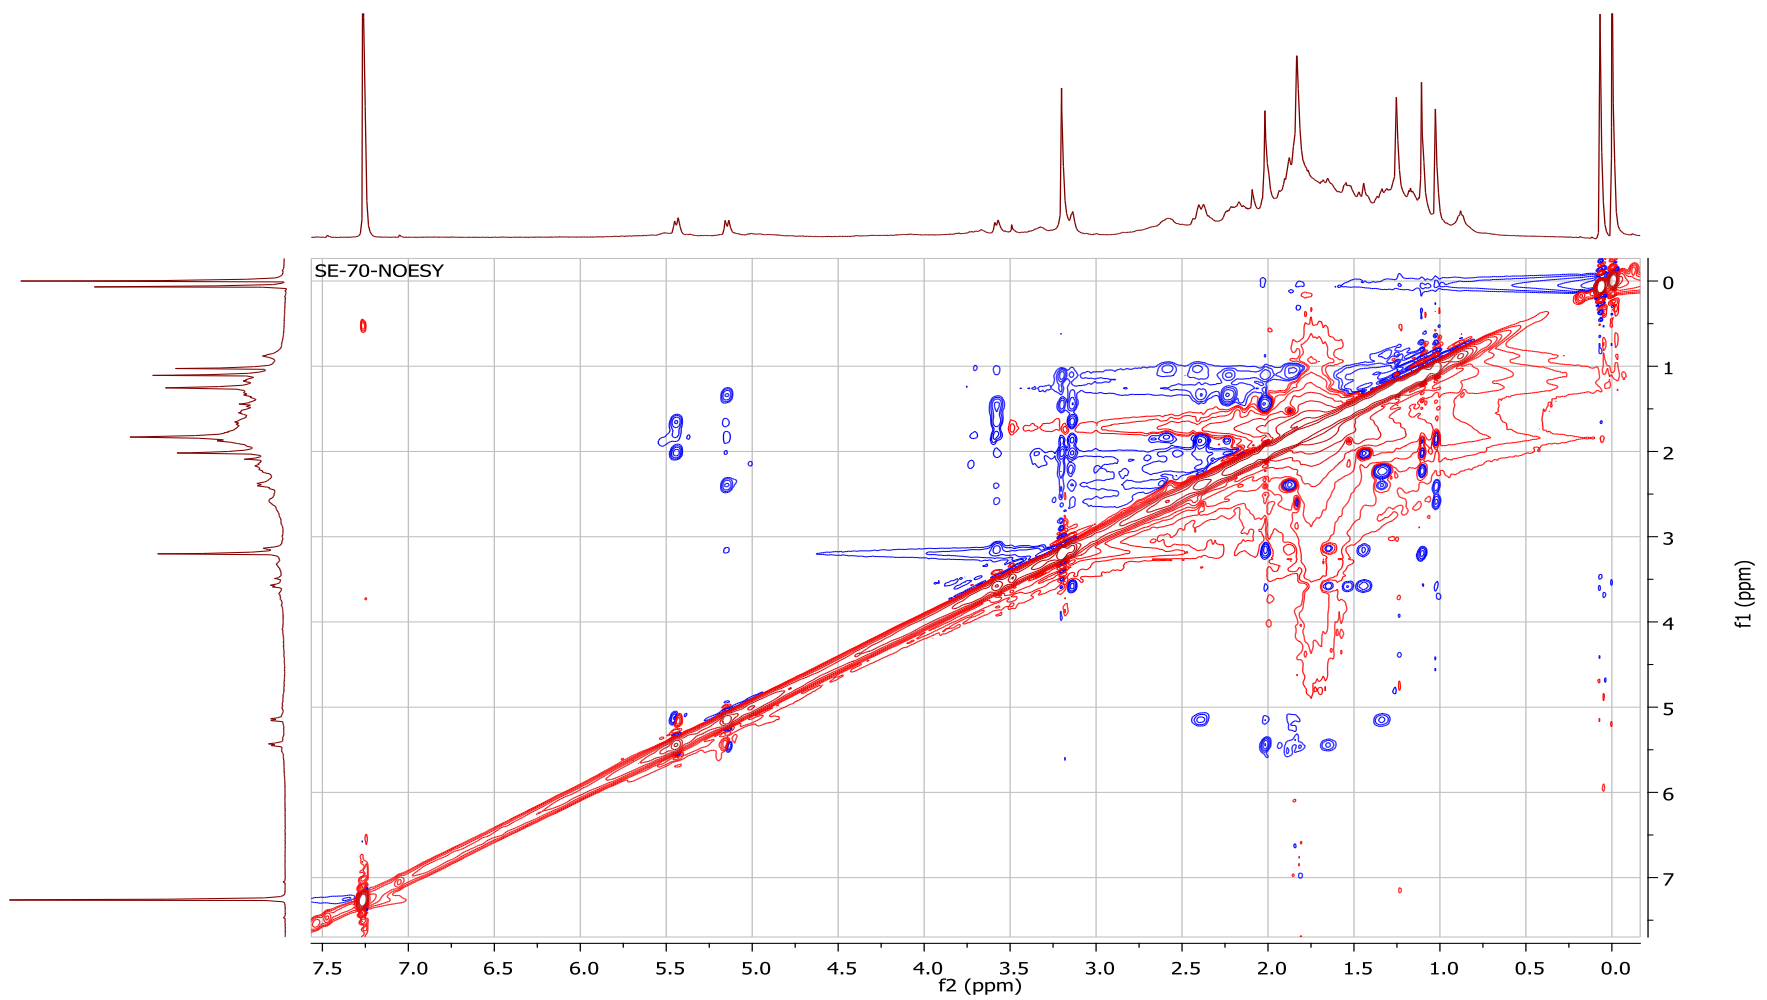

**S10: NOESY of 1**

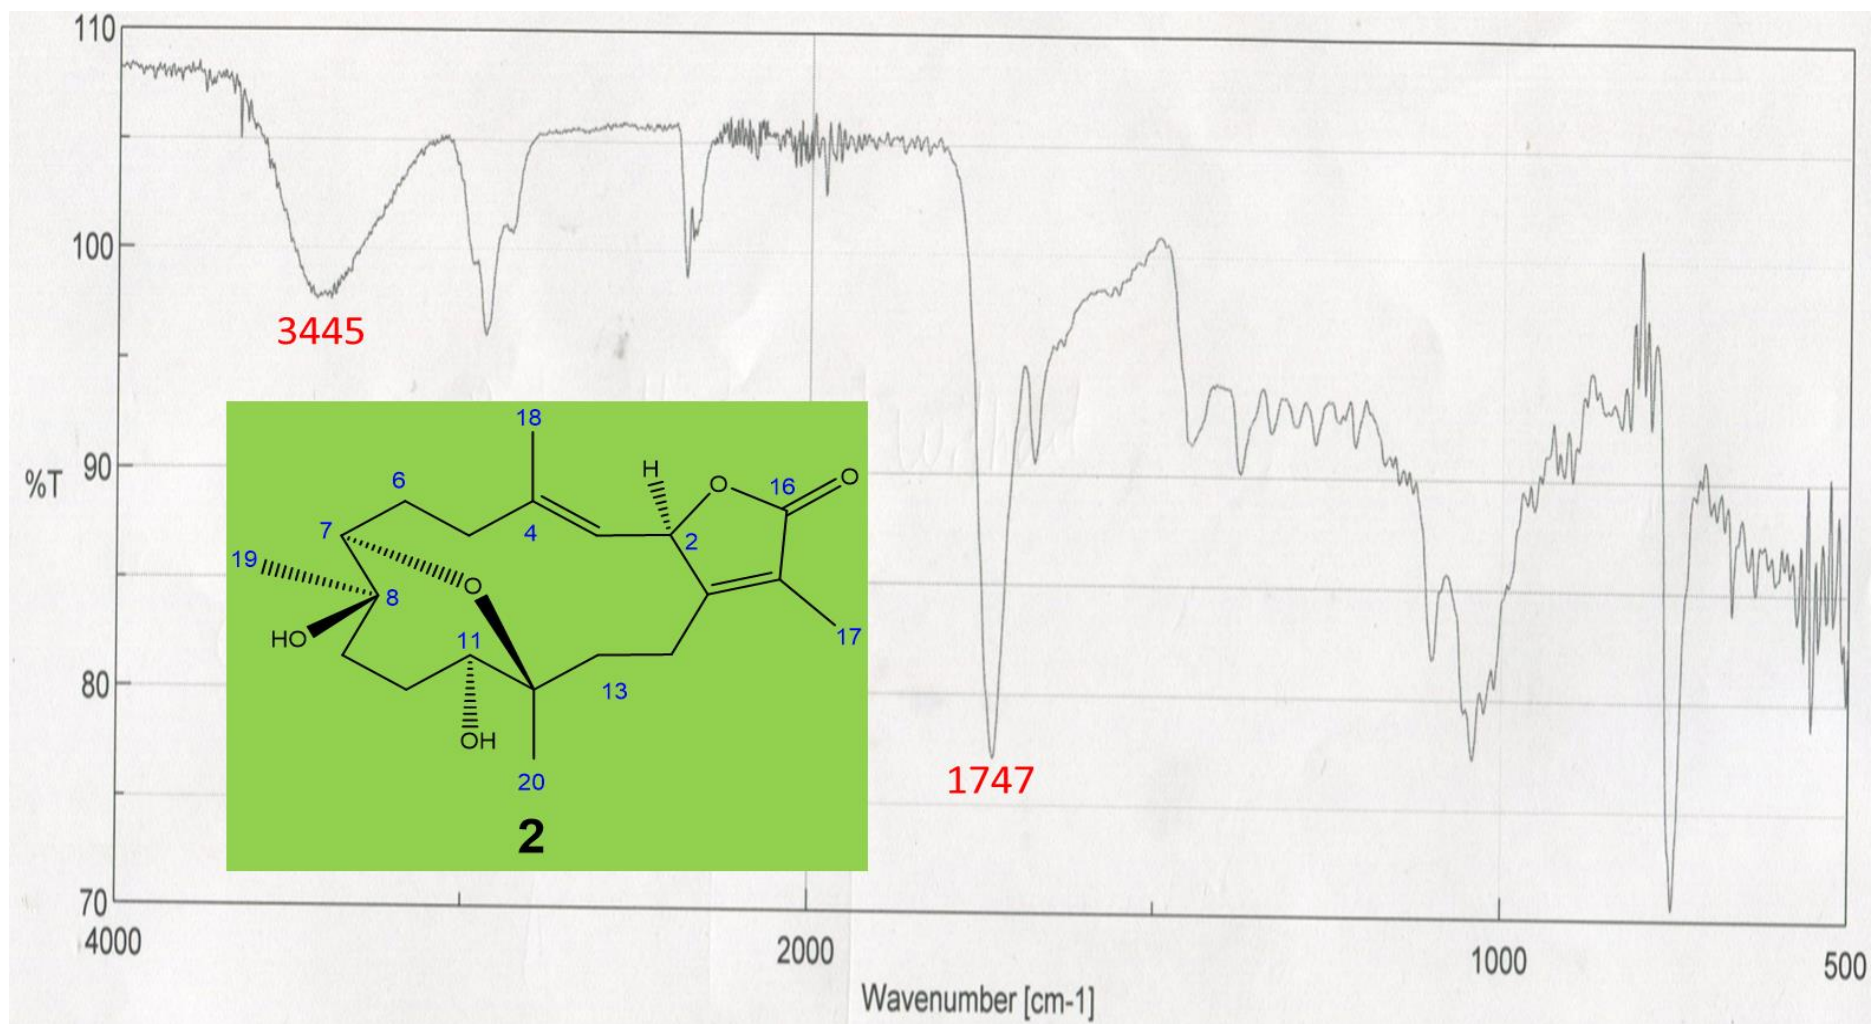

S11: FT-IR of 2



[ Mass Spectrum ]  
 Data : Umeyama-EI.06-Sep-2016.006 Date : 06-Sep-2016 10:14  
 Sample : SE-64  
 Note : MStation  
 Inlet : Direct Ion Mode : EI+  
 Spectrum Type : Normal Ion [MF-Linear]  
 RT : 1.37 min Scan# : 42  
 BP : m/z 43 Int. : 1599.98 (16776960)  
 Output m/z range : 35 to 500 Cut Level : 0.00 %

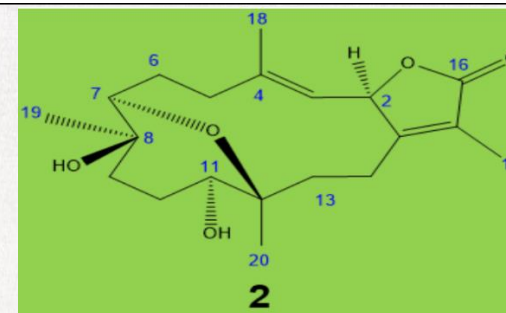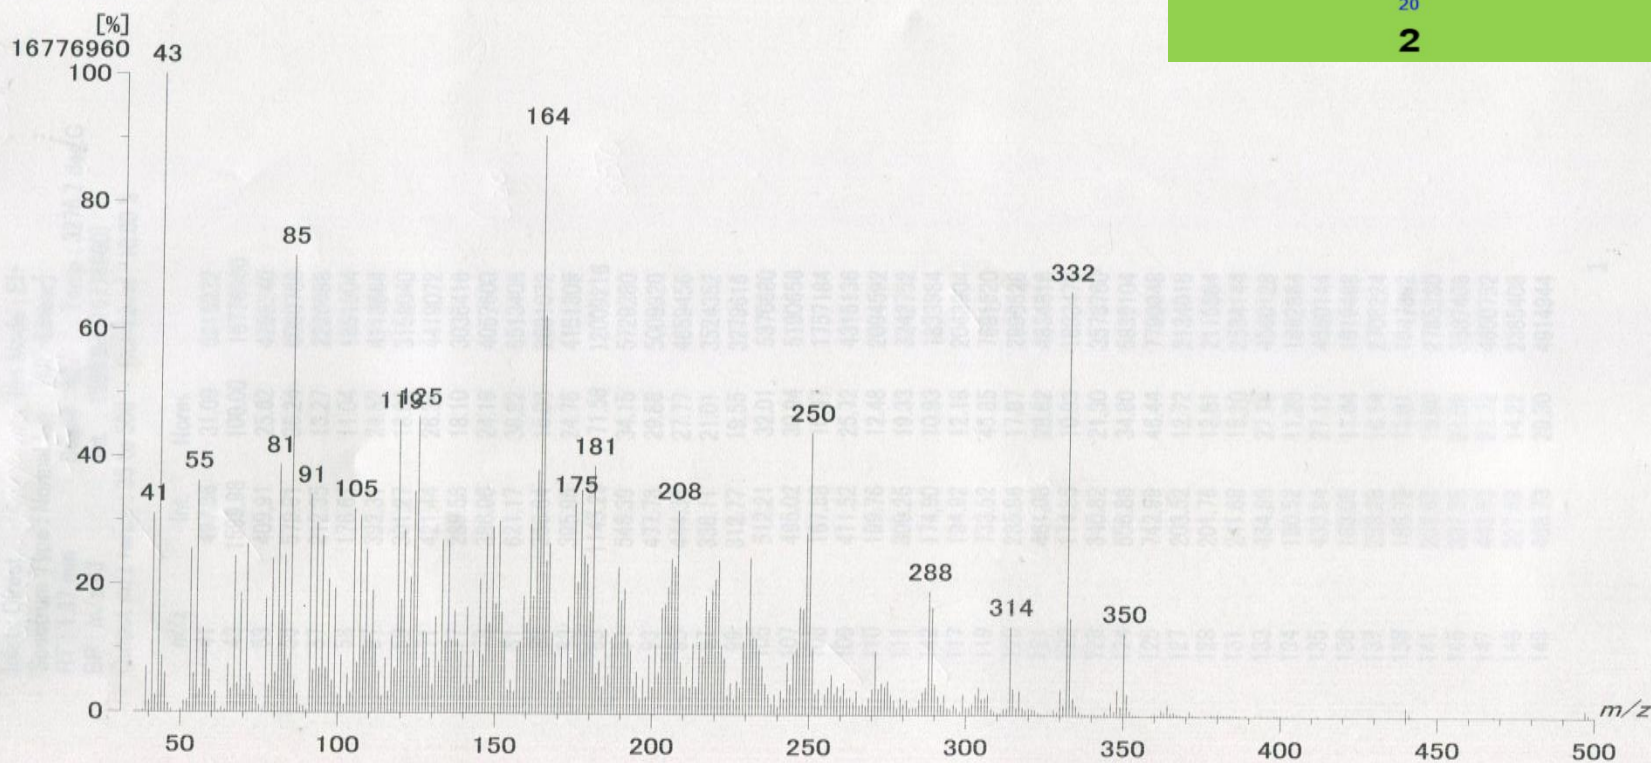

S12: LREIMS of 2

Data : Umeiyama-EIHR.07-Sep-2016.003  
 Instrument : MS700D  
 Sample : SE--64  
 Note : MStation  
 Inlet : Direct      Ion Mode : EI+  
 RT : 1.88 min      Scan# : 48  
 Elements : C 150/0, H 250/0, O 50/0  
 Mass Tolerance : 5mmu  
 Unsaturation (U.S.) : 0.0 - 15.0

Date : 07-Sep-2016 09:09

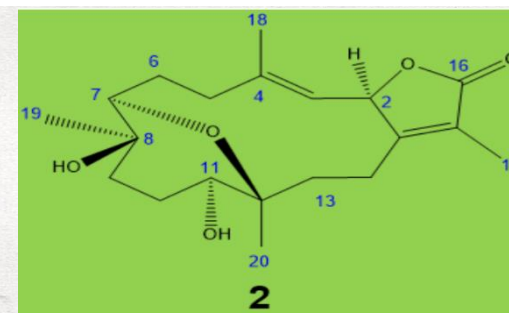

|   | Observed m/z | Int%   | Err [ppm / mmu] | U.S. Composition |
|---|--------------|--------|-----------------|------------------|
| 1 | 332.2008     | 100.00 | +6.1 / +2.0     | 7.0 C20 H28 O4   |
| 2 | 350.2094     | 22.70  | +0.2 / +0.1     | 6.0 C20 H30 O5   |

S13: HREIMS of 2

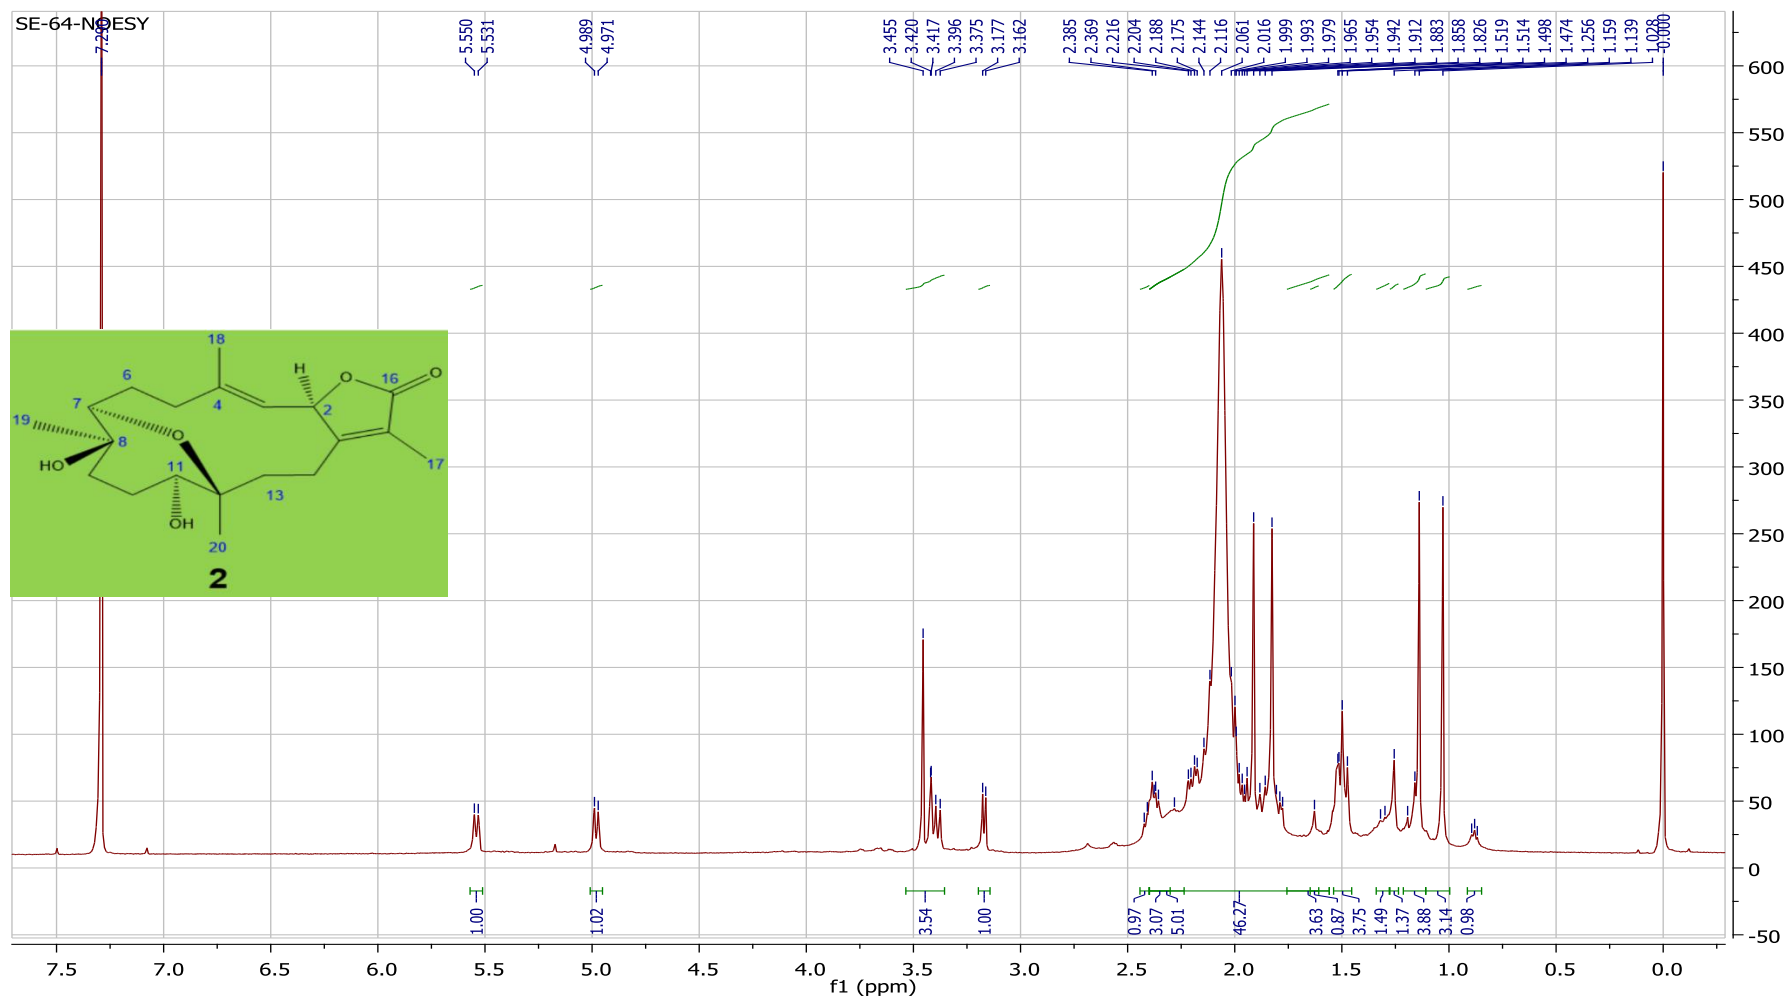

S14:  $^1\text{H}$  NMR of **2**

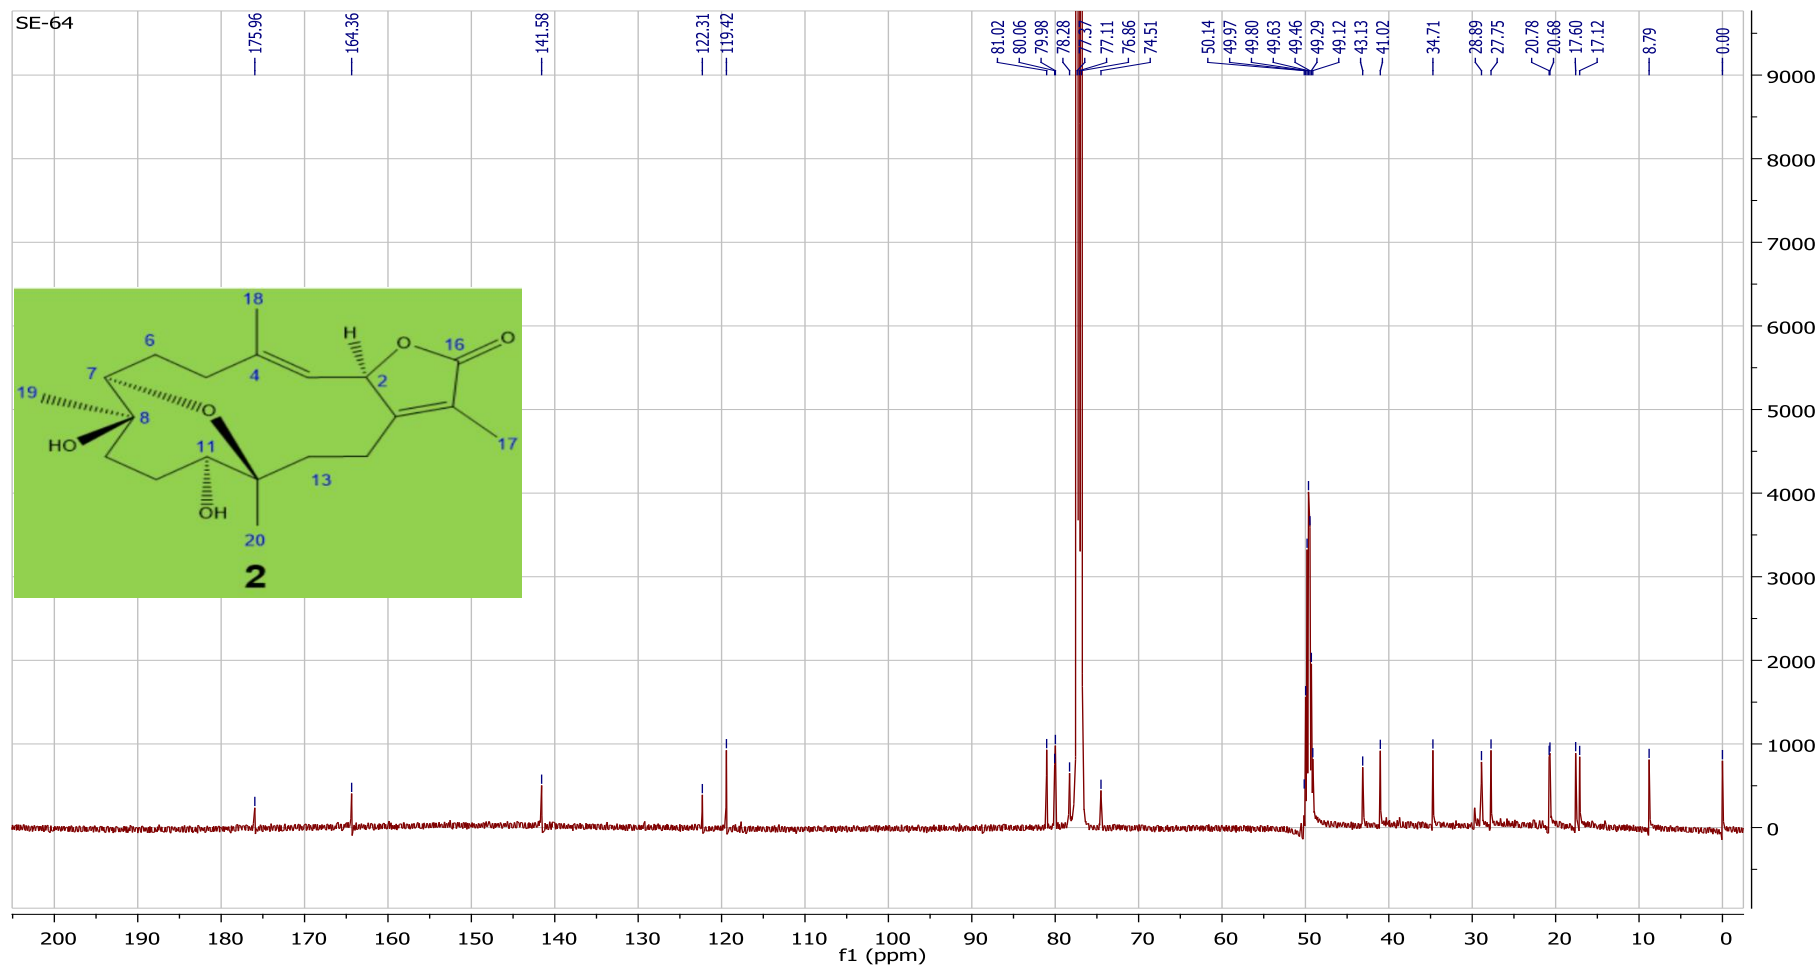

S15:  $^{13}\text{C}$  NMR of **2**

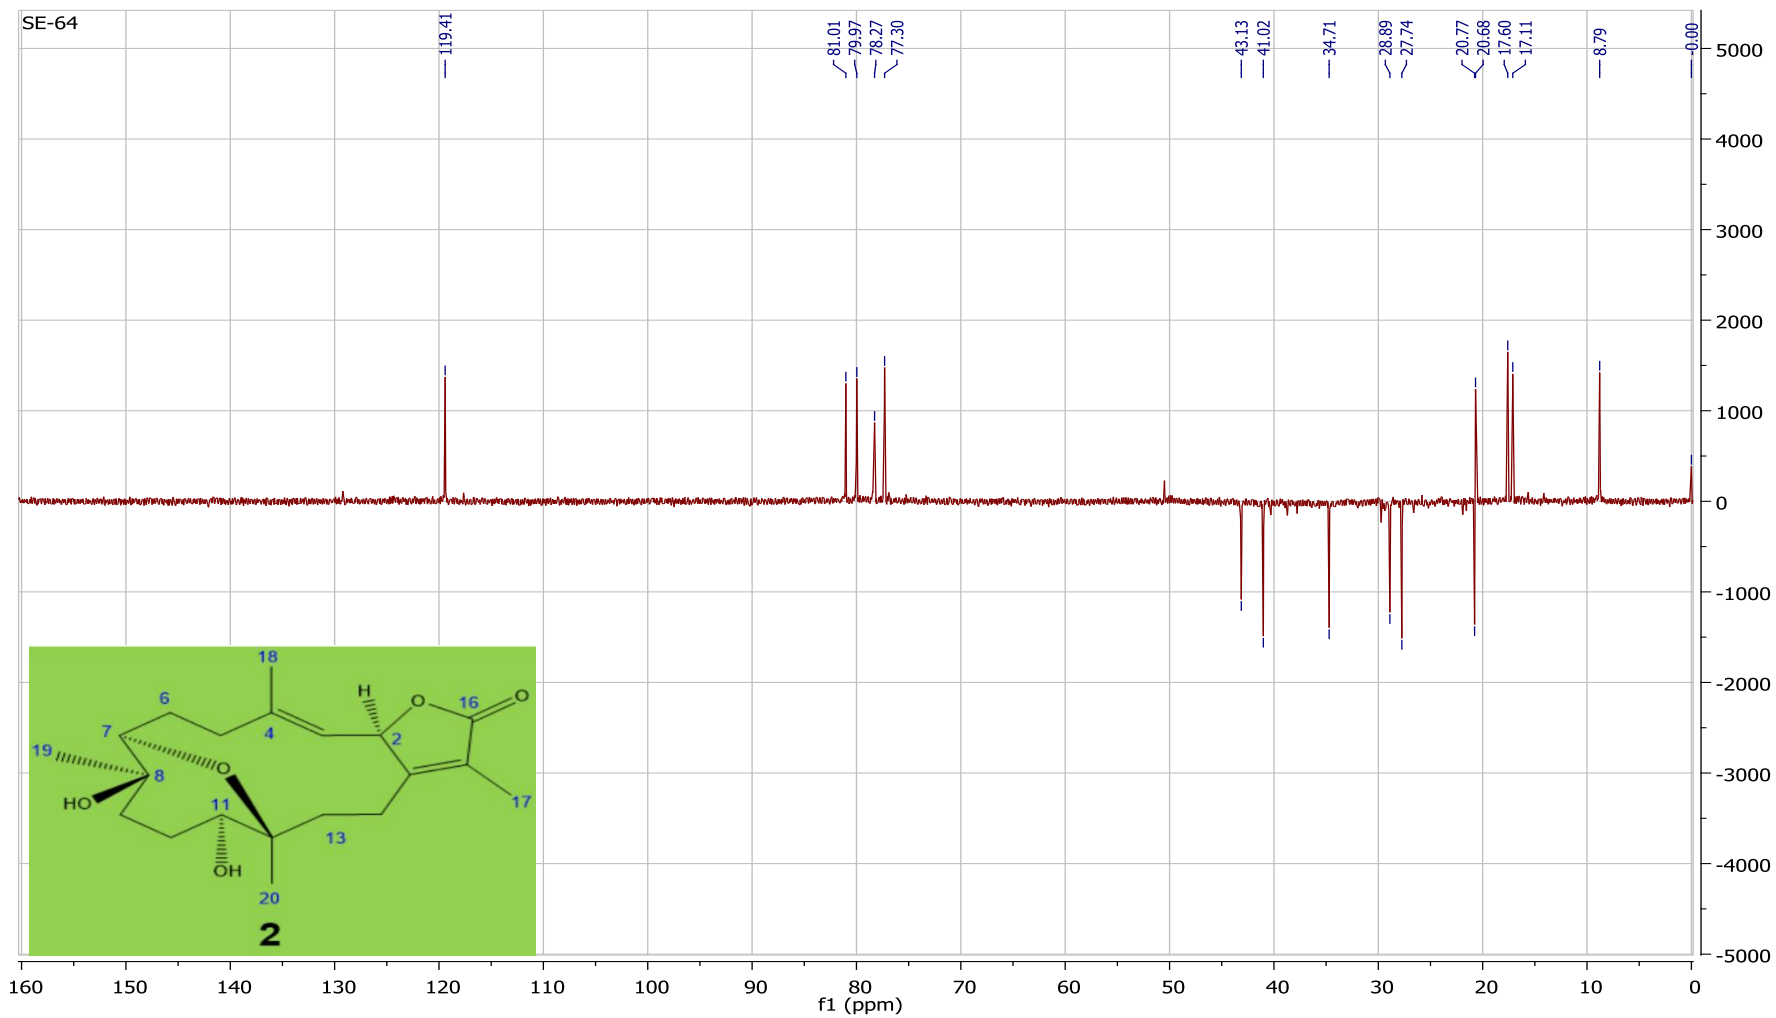

S16: DEPT-135 of 2



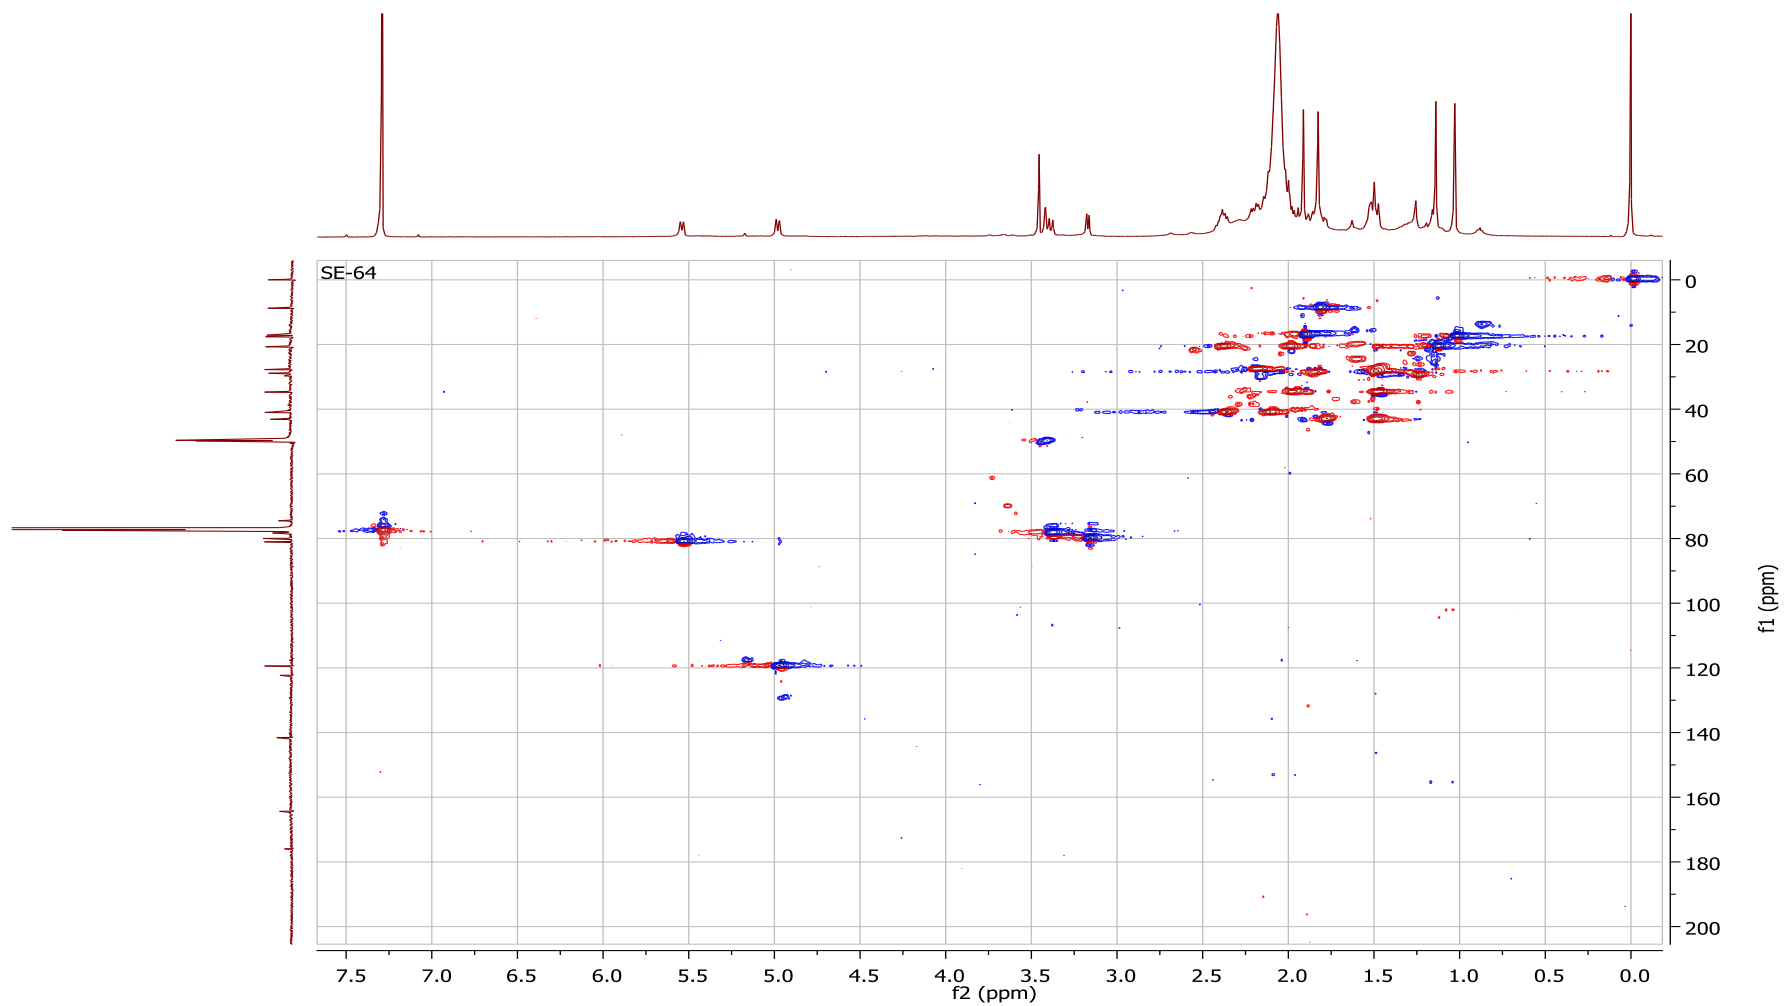

S17: HSQC of 2

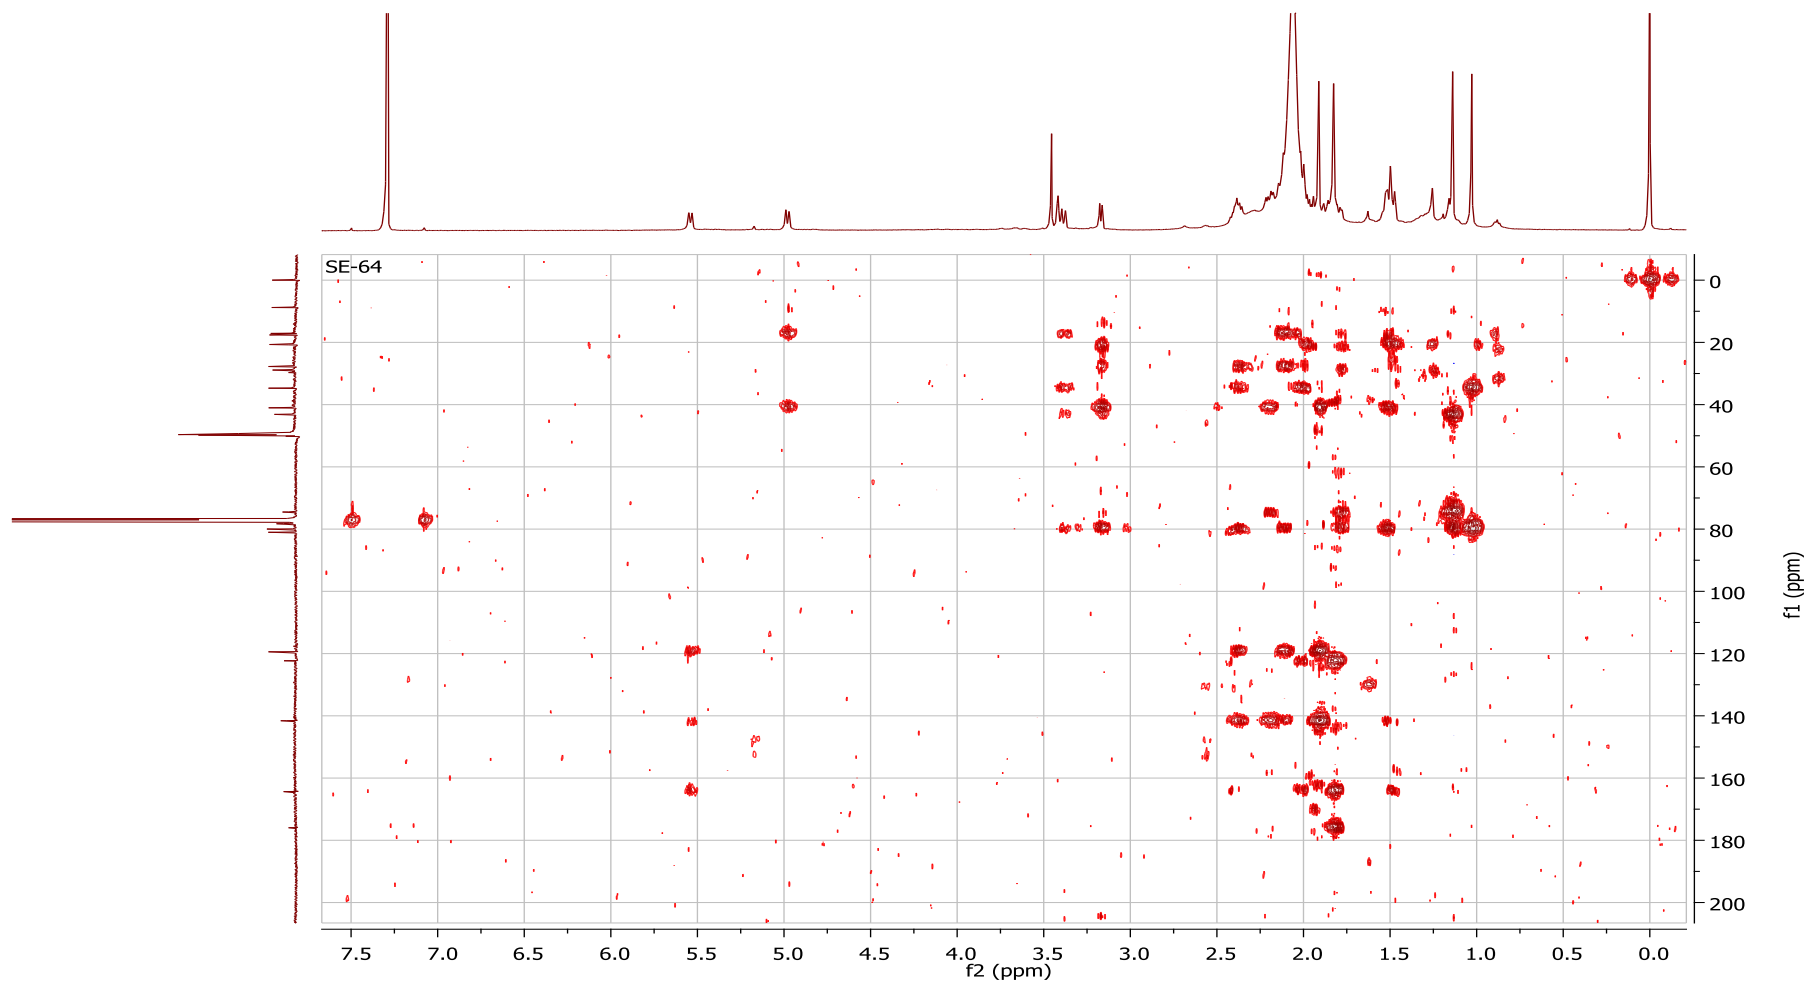

**S18:** HMBC of **2**

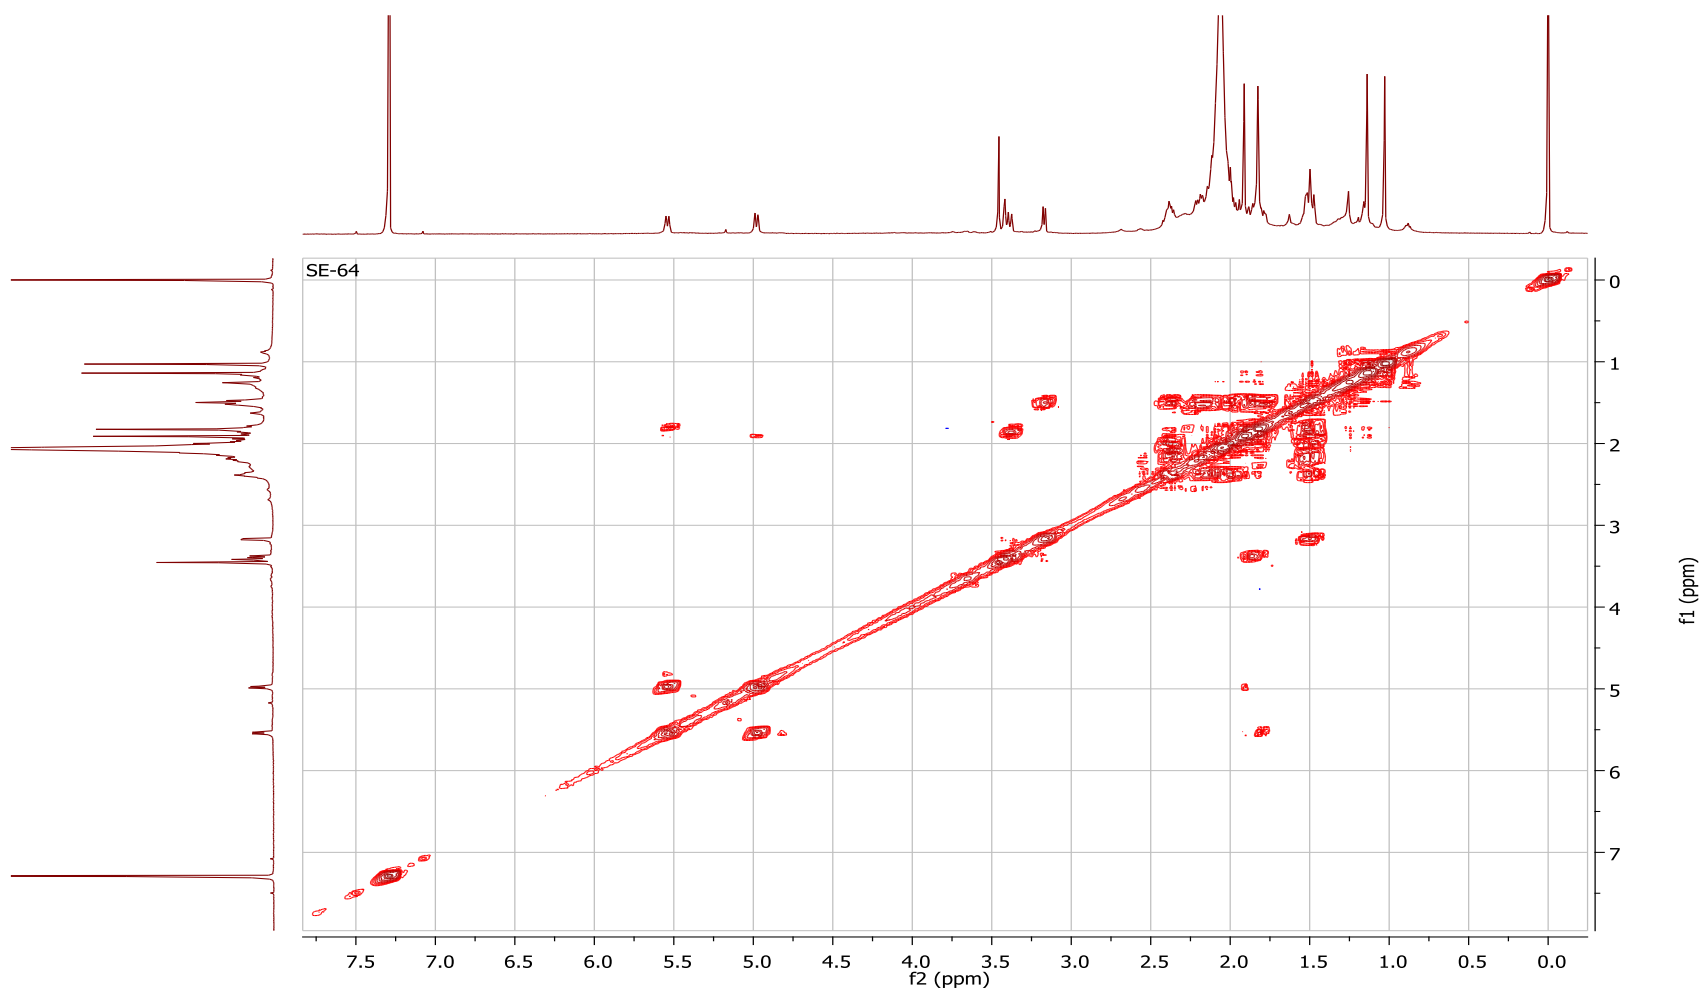

S19:  $^1\text{H}^1\text{H}$  COSY of 2

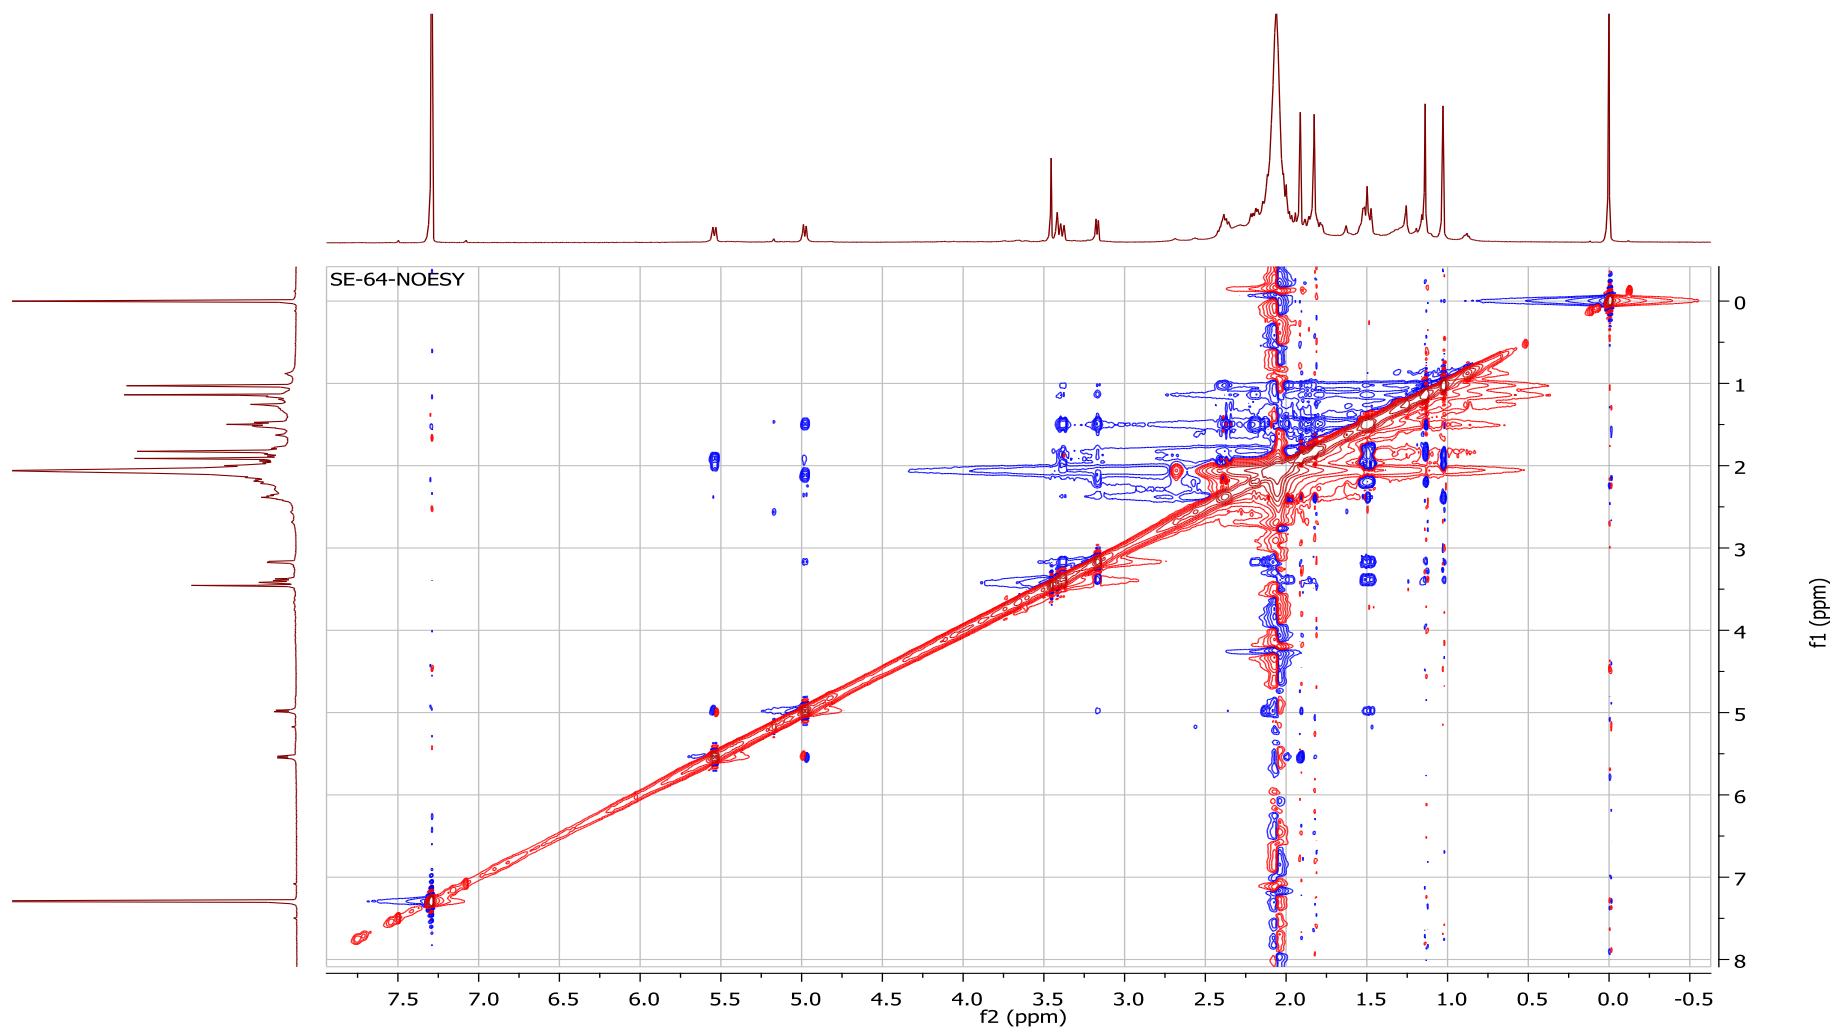

S20: NOESY of 2

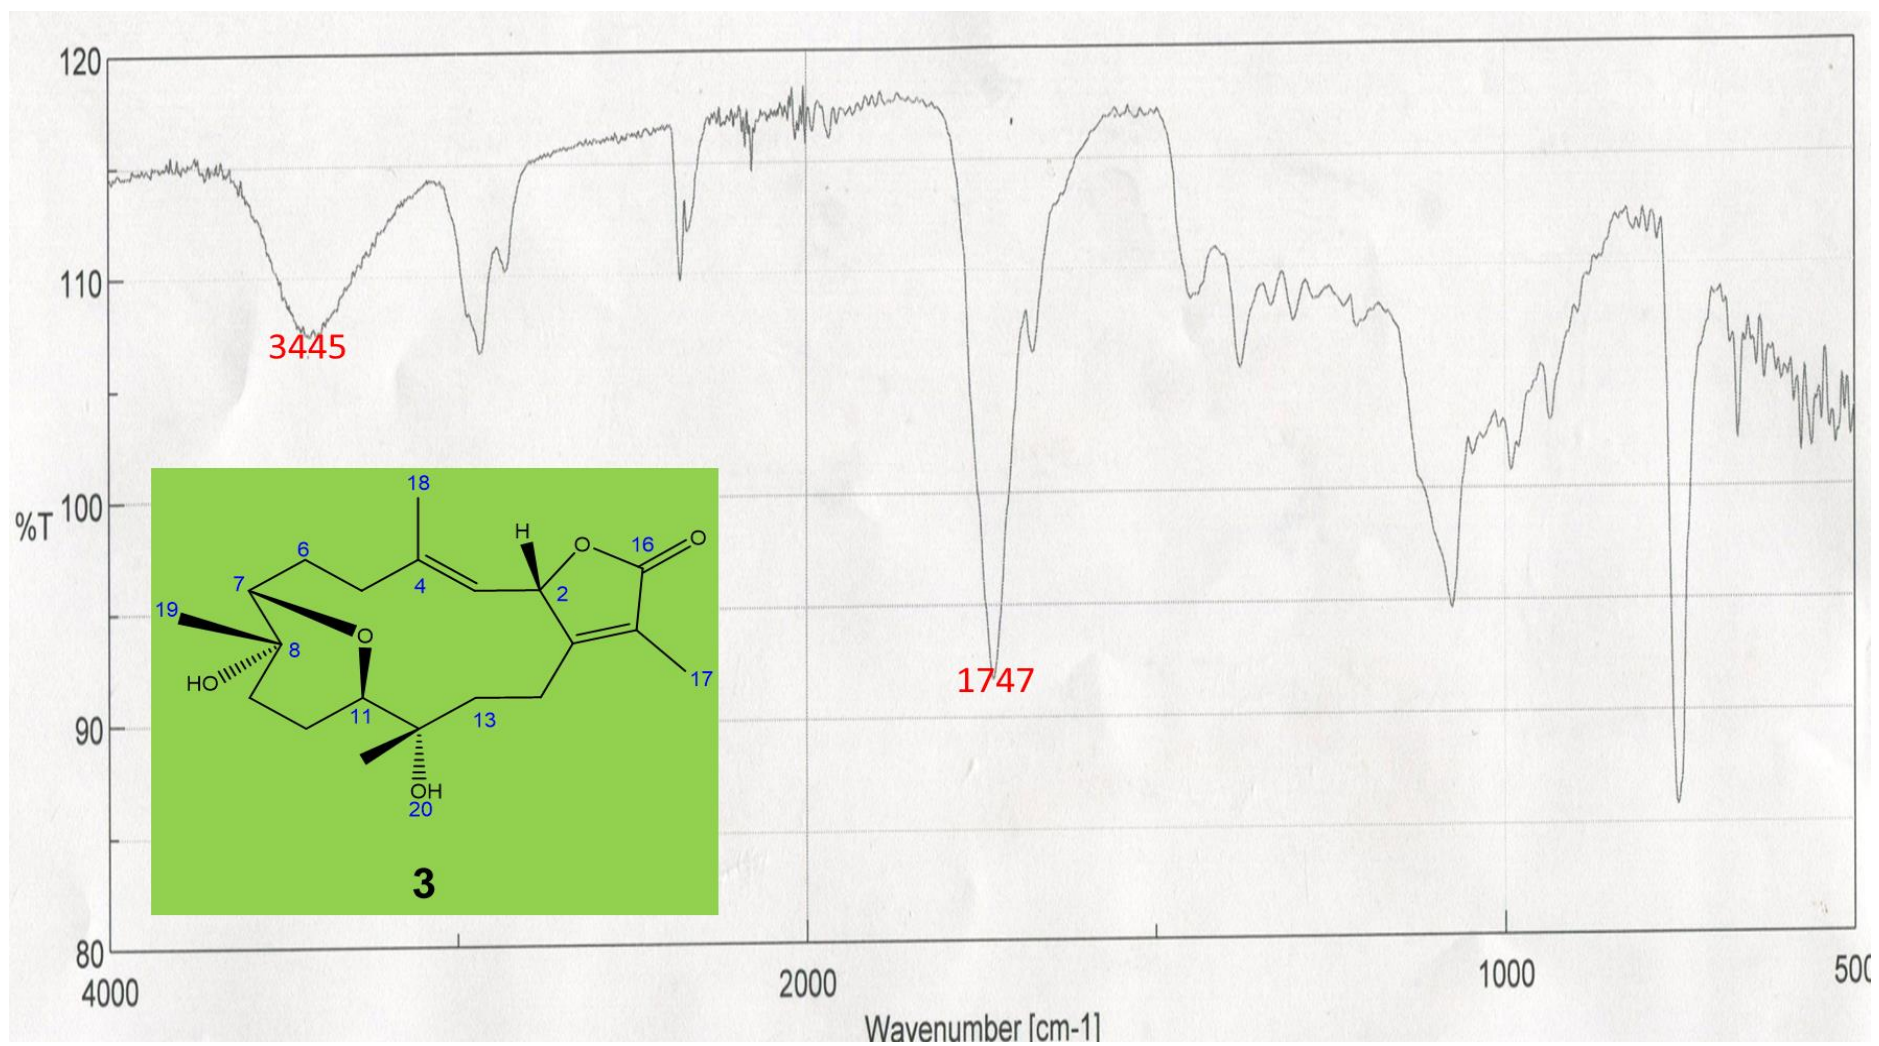

S21: FT-IR of 3



[ Mass Spectrum ]  
 Data : Umeyama-EI.29-Aug-2016.004      Date : 29-Aug-2016 10:45  
 Sample : SE-65  
 Note : MStation  
 Inlet : Direct      Ion Mode : EI+  
 Spectrum Type : Normal Ion [MF-Linear]  
 RT : 1.60 min      Scan# : 49  
 BP : m/z 43      Int. : 107.85 (1130880)  
 Output m/z range : 35 to 500      Cut Level : 0.00 %

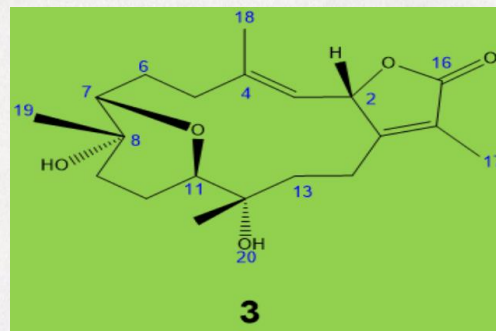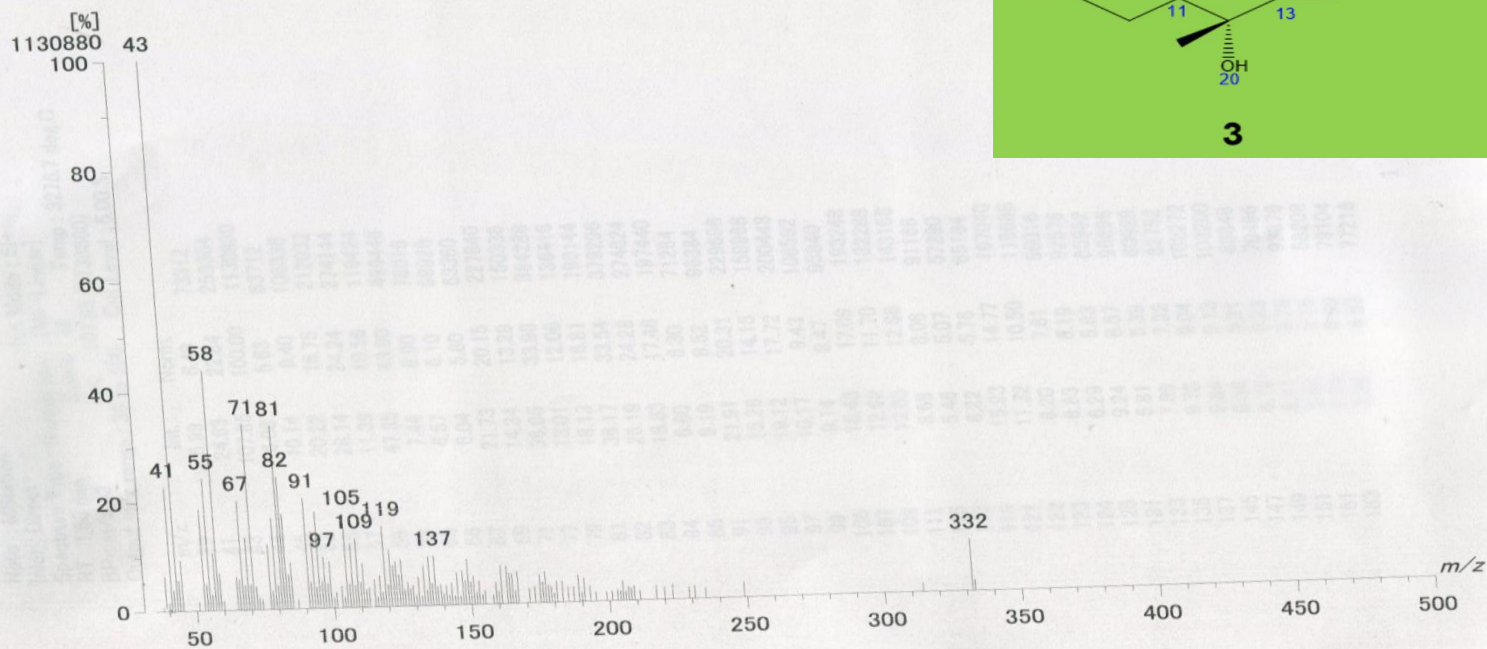

S22: LREIMS of 3

Data : Umeyama-EIHR.29-Aug-2016.007

Date : 29-Aug-2016 14:59

Instrument : MS700D

Sample : SE-65

Note : MStation

Inlet : Direct Ion Mode : EI+

RT : 1.36 min Scan# : 35

Elements : C 150/0, H 250/0, O 50/0

Mass Tolerance : 5mmu

Unsaturation (U.S.) : 0.0 - 15.0

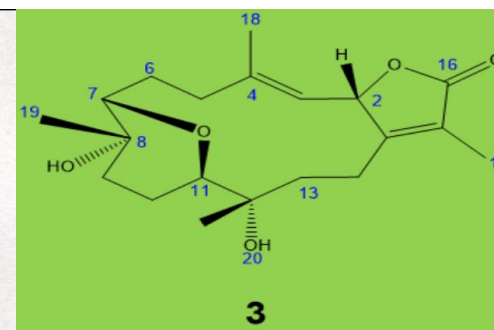

|   | Observed m/z | Int%  | Err [ppm / mmu] | U.S. Composition |
|---|--------------|-------|-----------------|------------------|
| 1 | 332.1993     | 16.32 | +1.6 / +0.5     | 7.0 C20 H28 O4   |

S23: HREIMS of 3

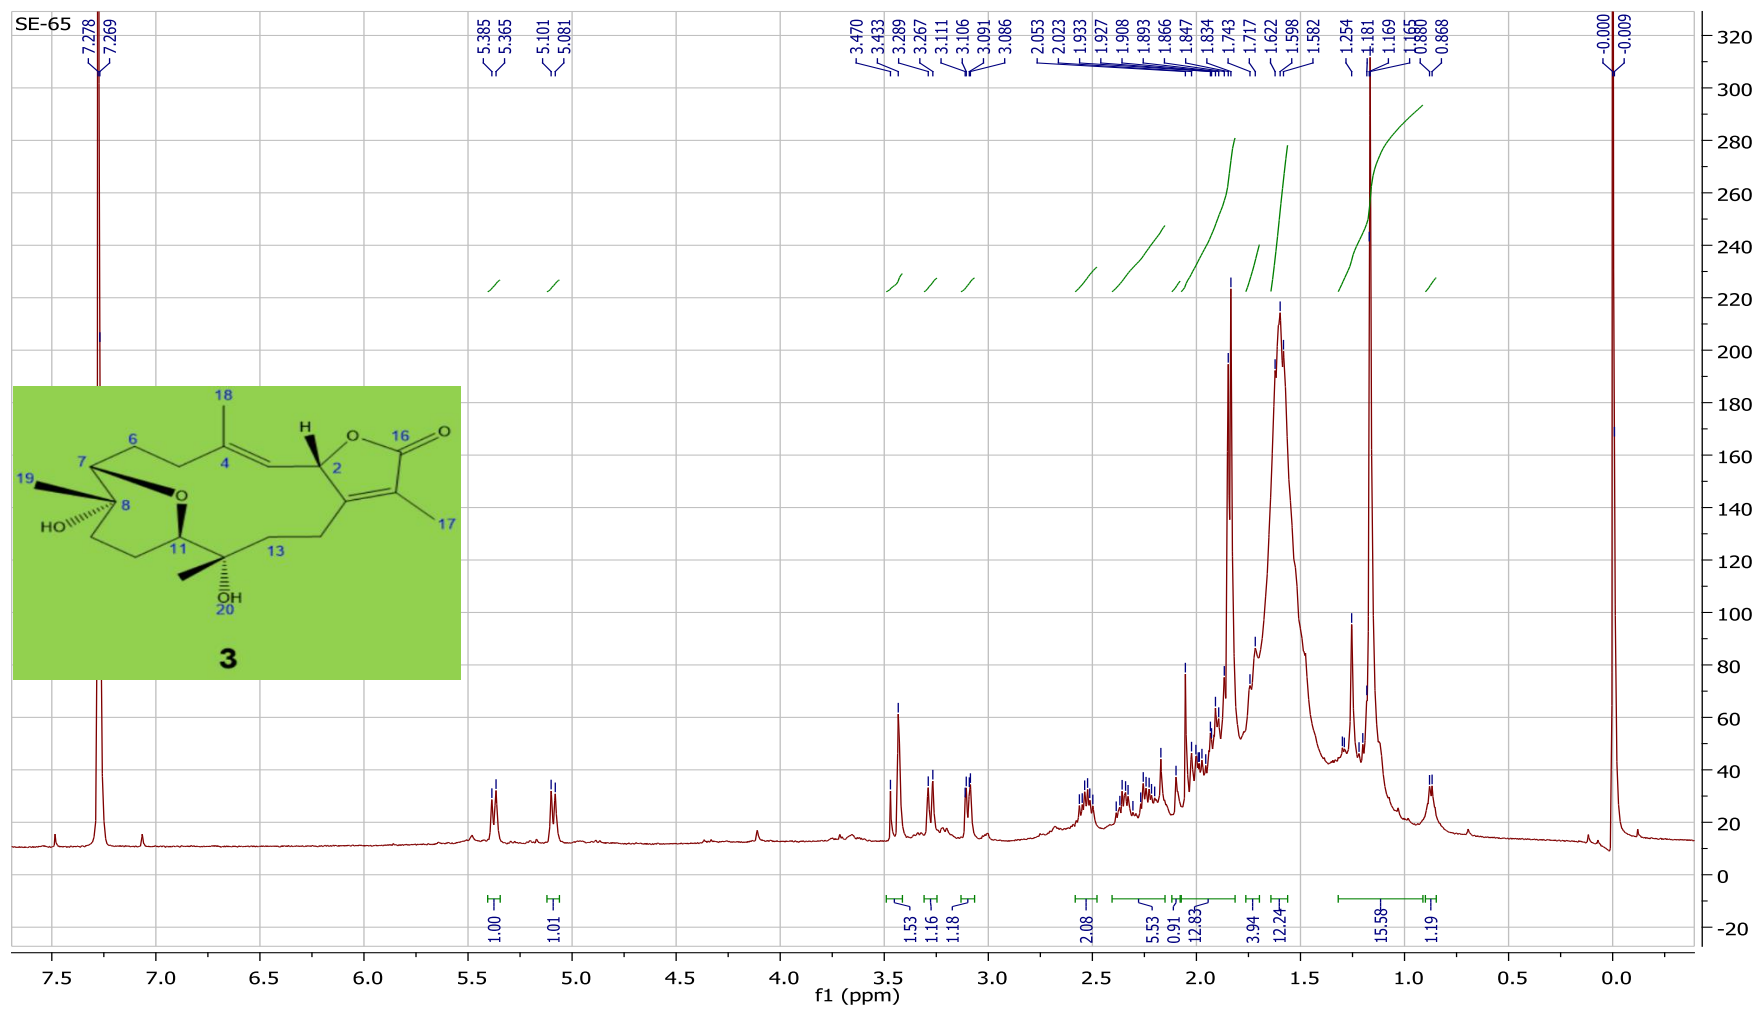

S24:  $^1\text{H}$  NMR of 3

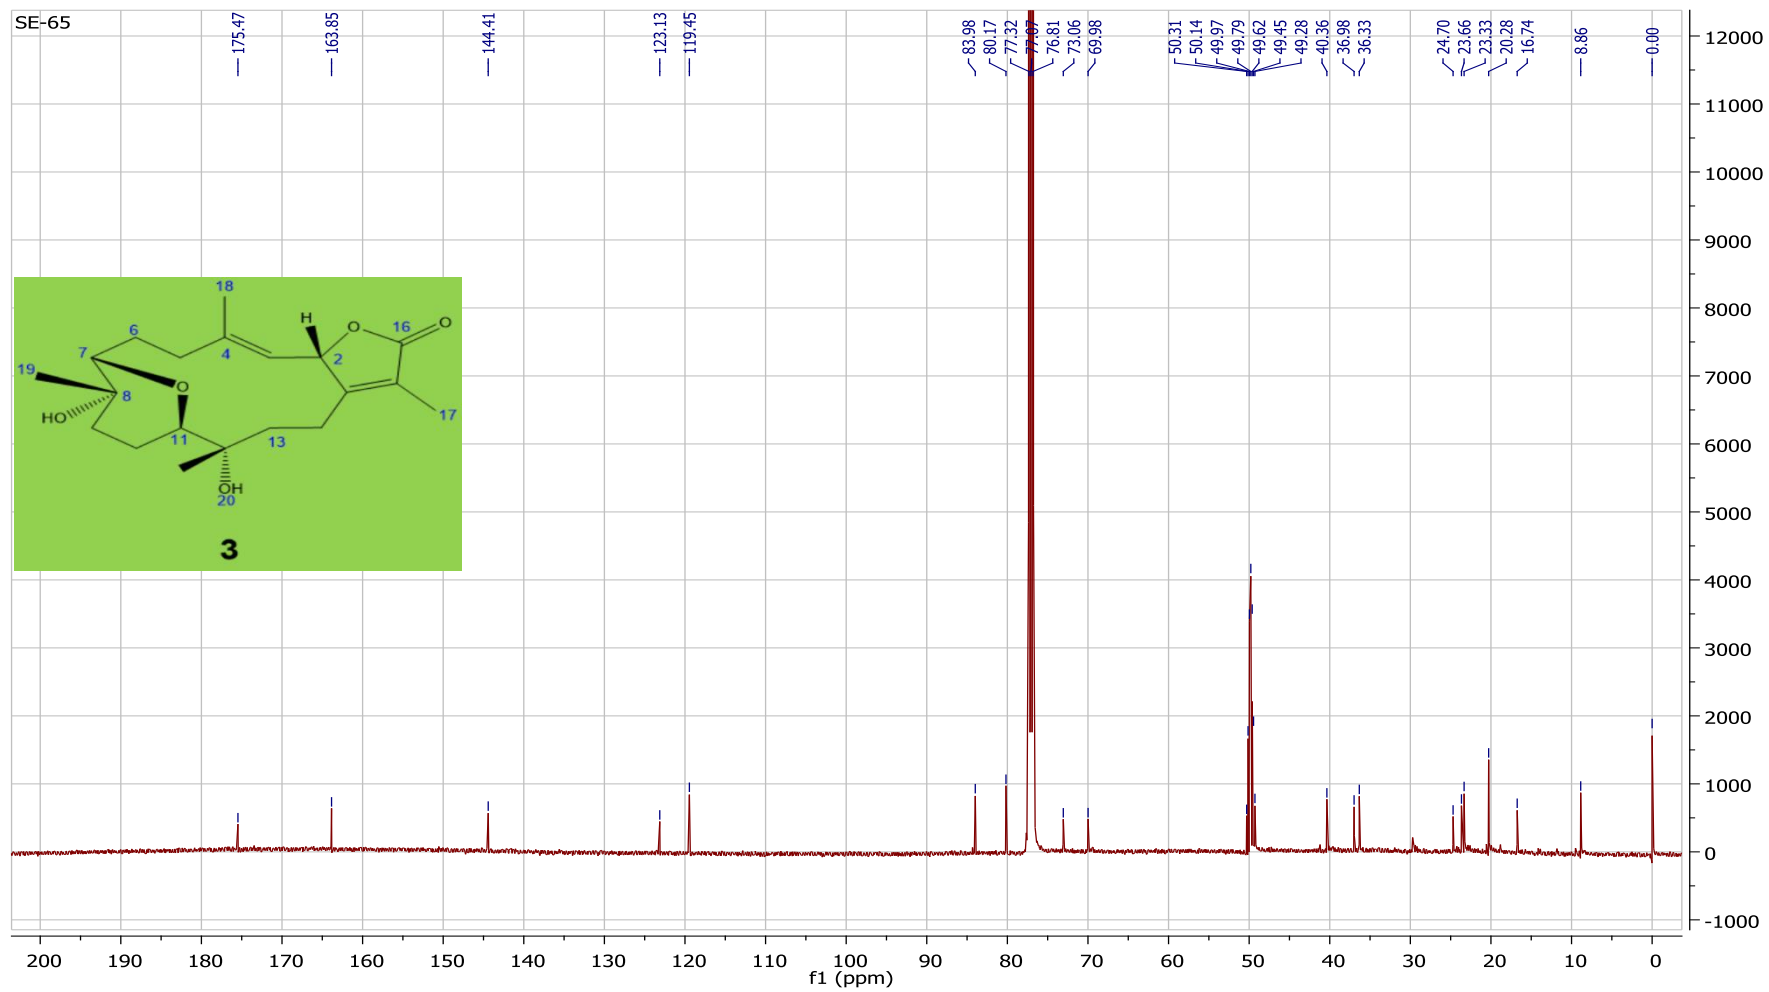

S25:  $^{13}\text{C}$  NMR of **3**

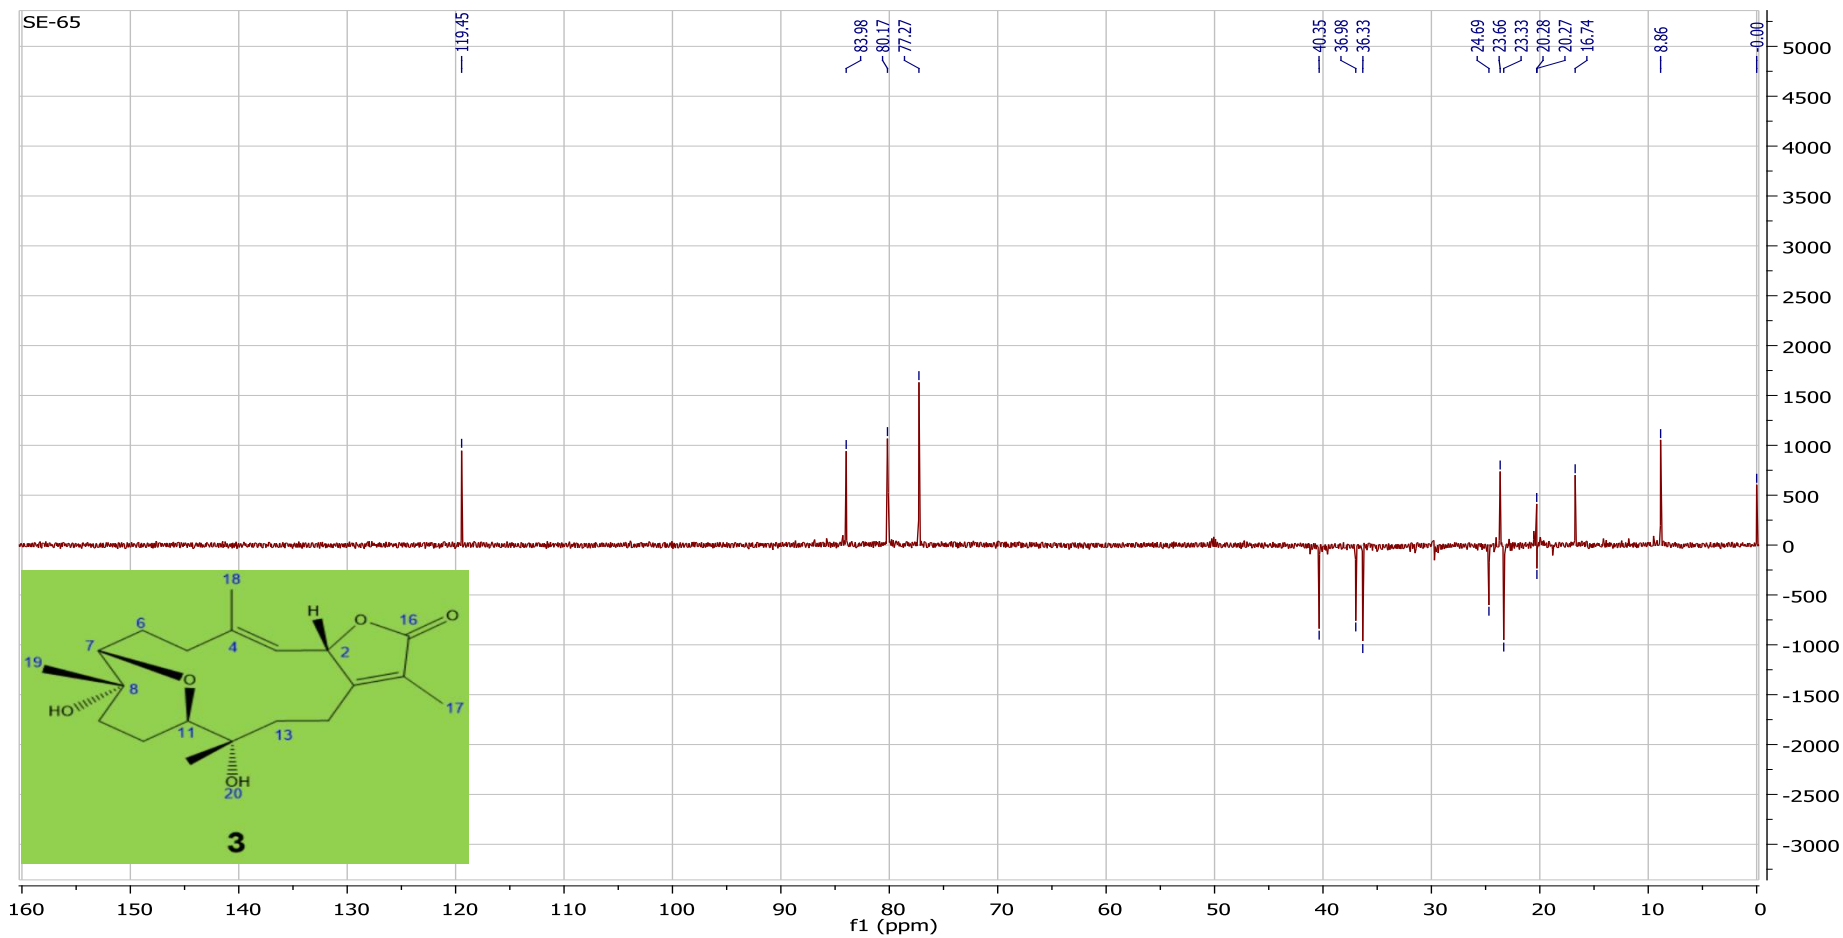

S26:DEPT-135 of 3

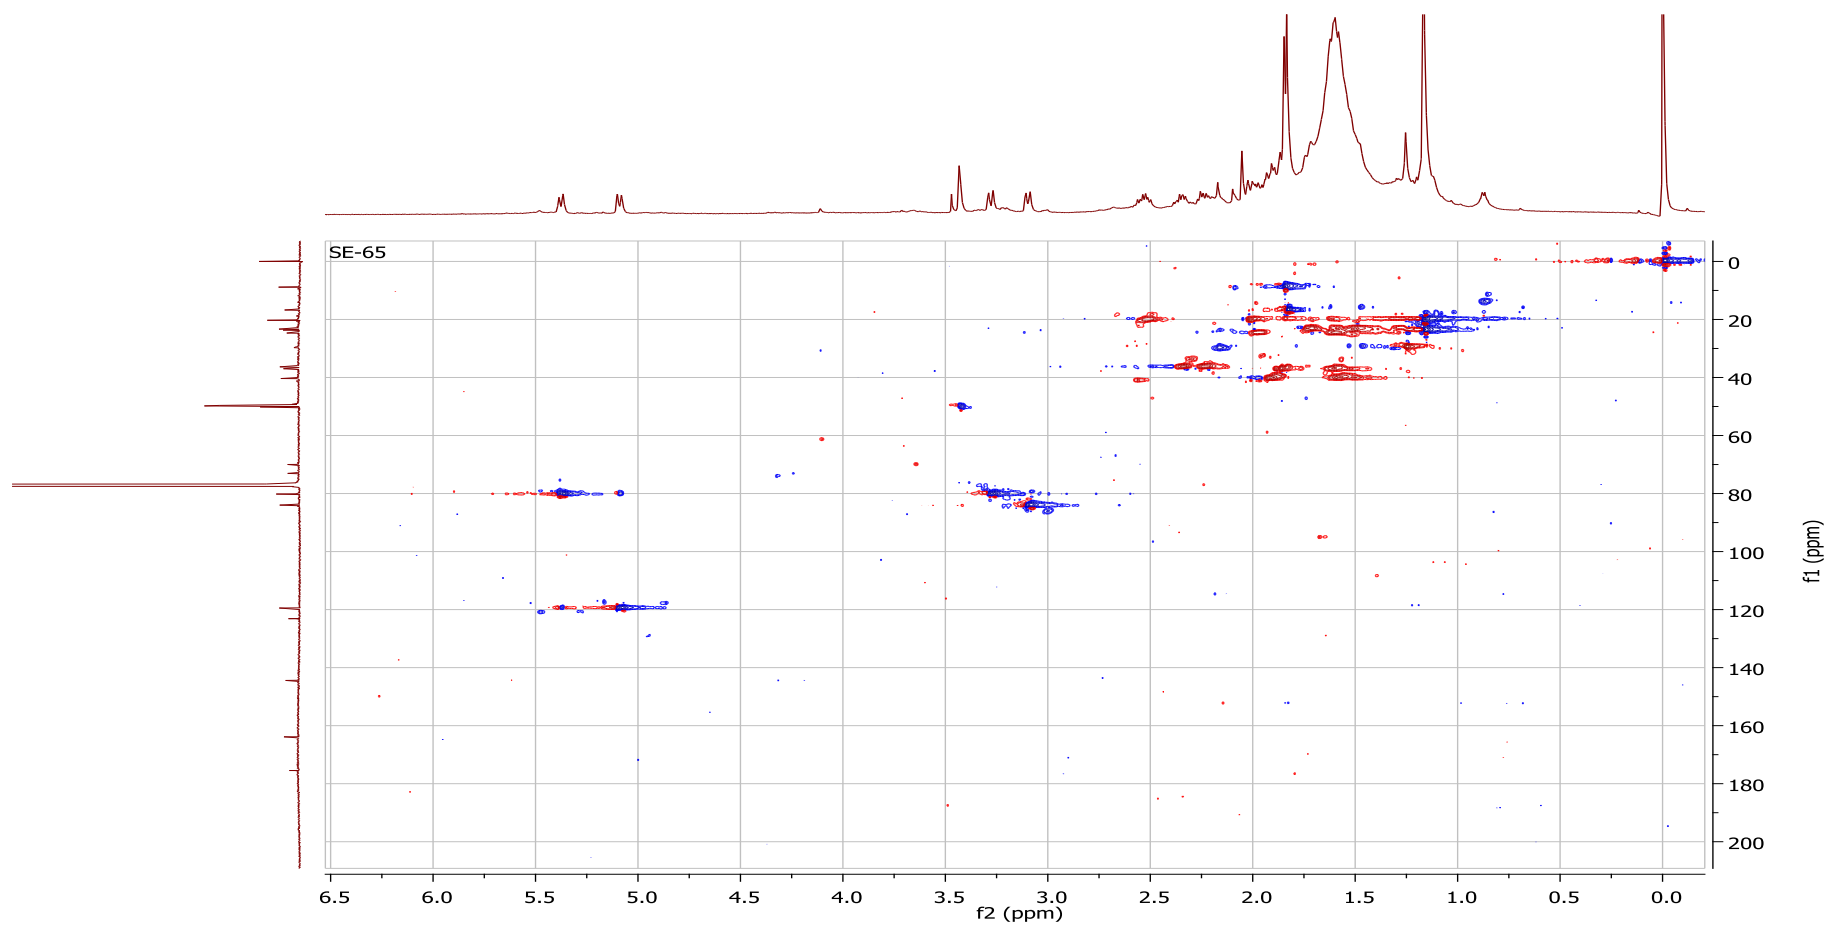

**S27:** HSQC of **3**

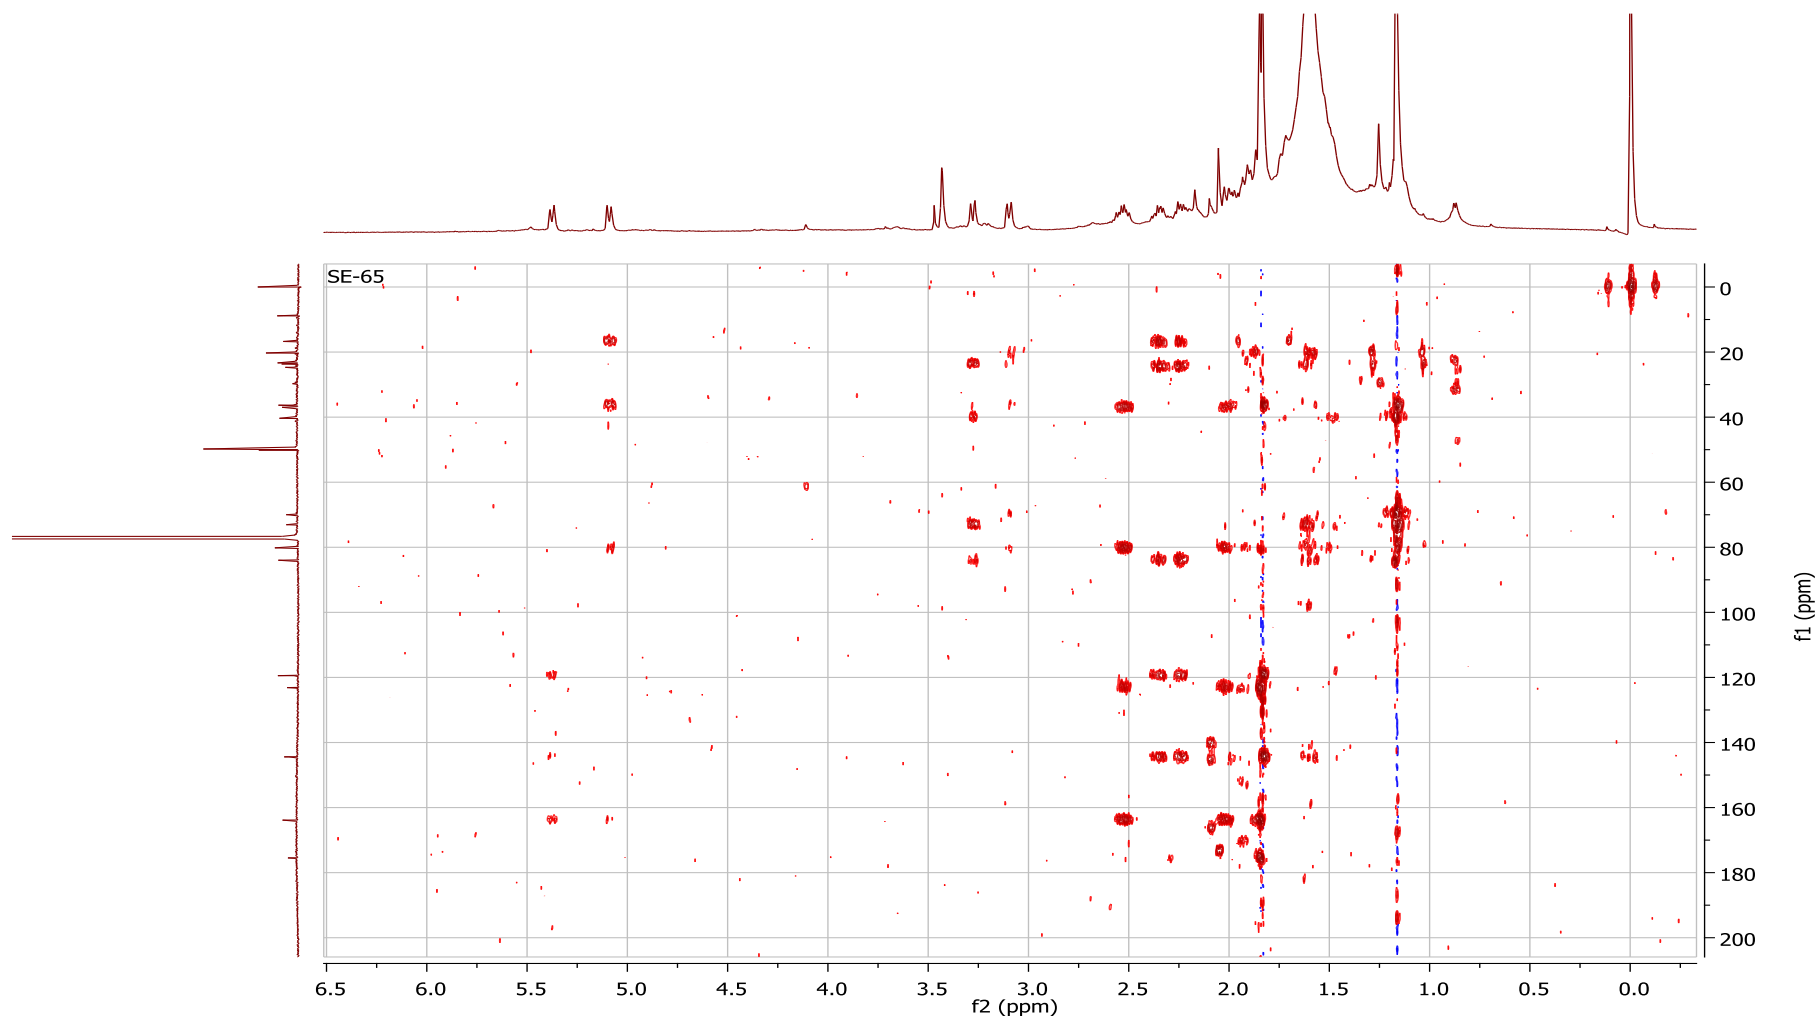

**S28:** HMBC of **3**



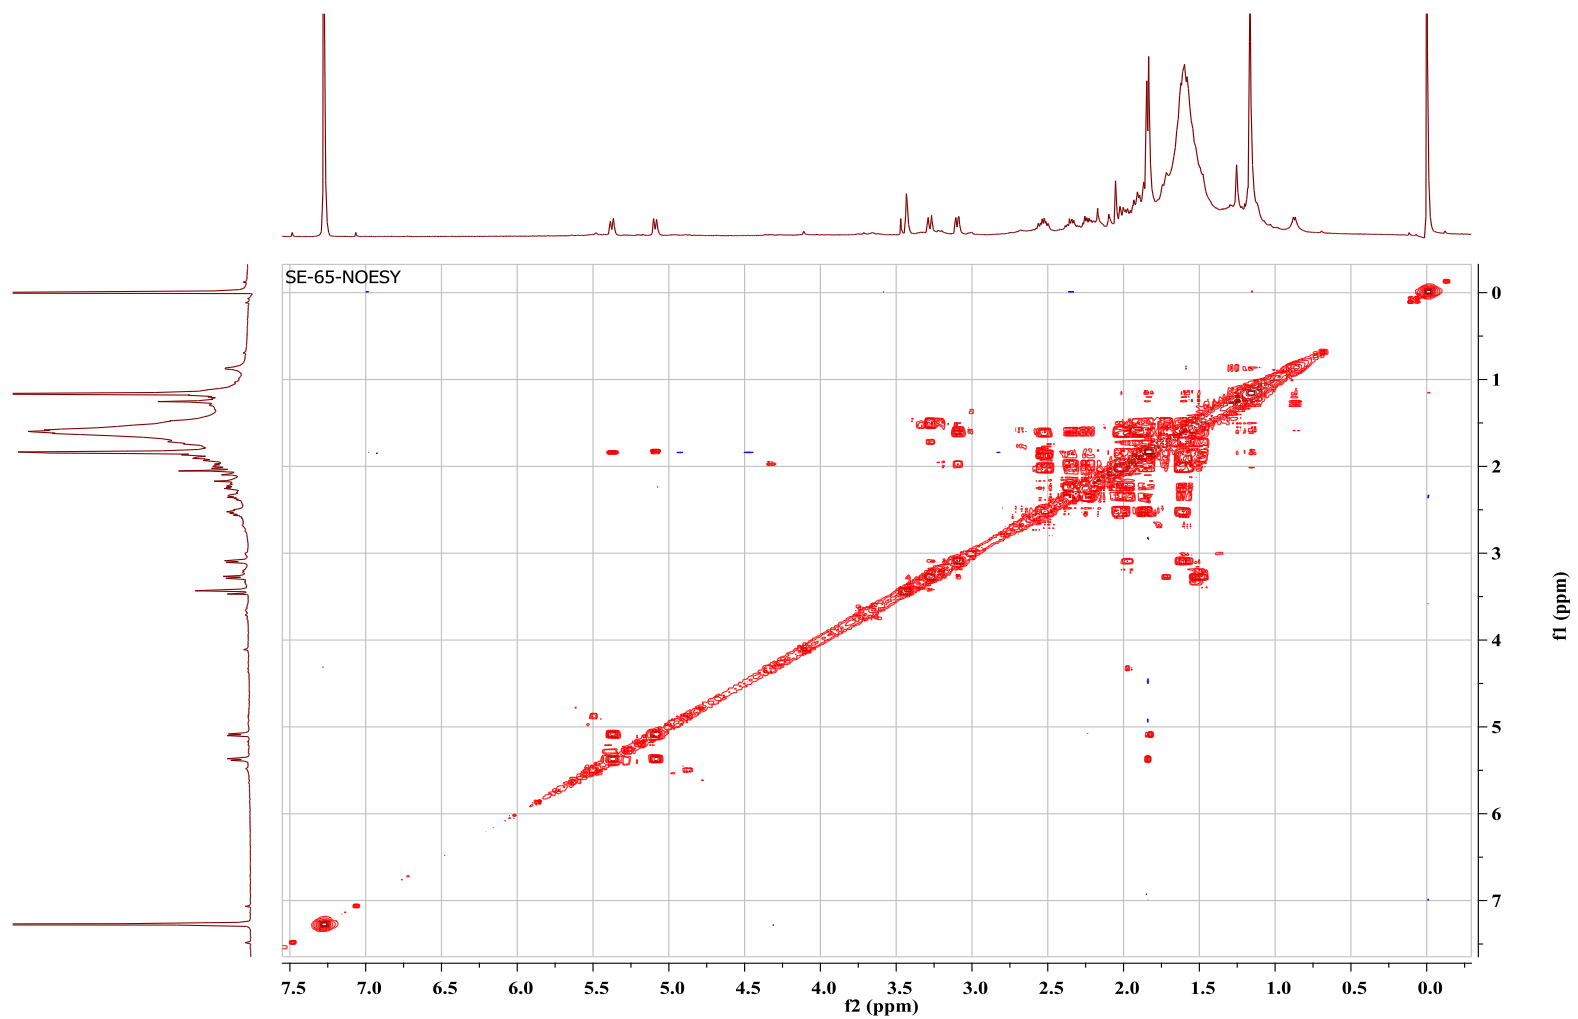

S29:  $^1\text{H}$   $^1\text{H}$  COSY of 3

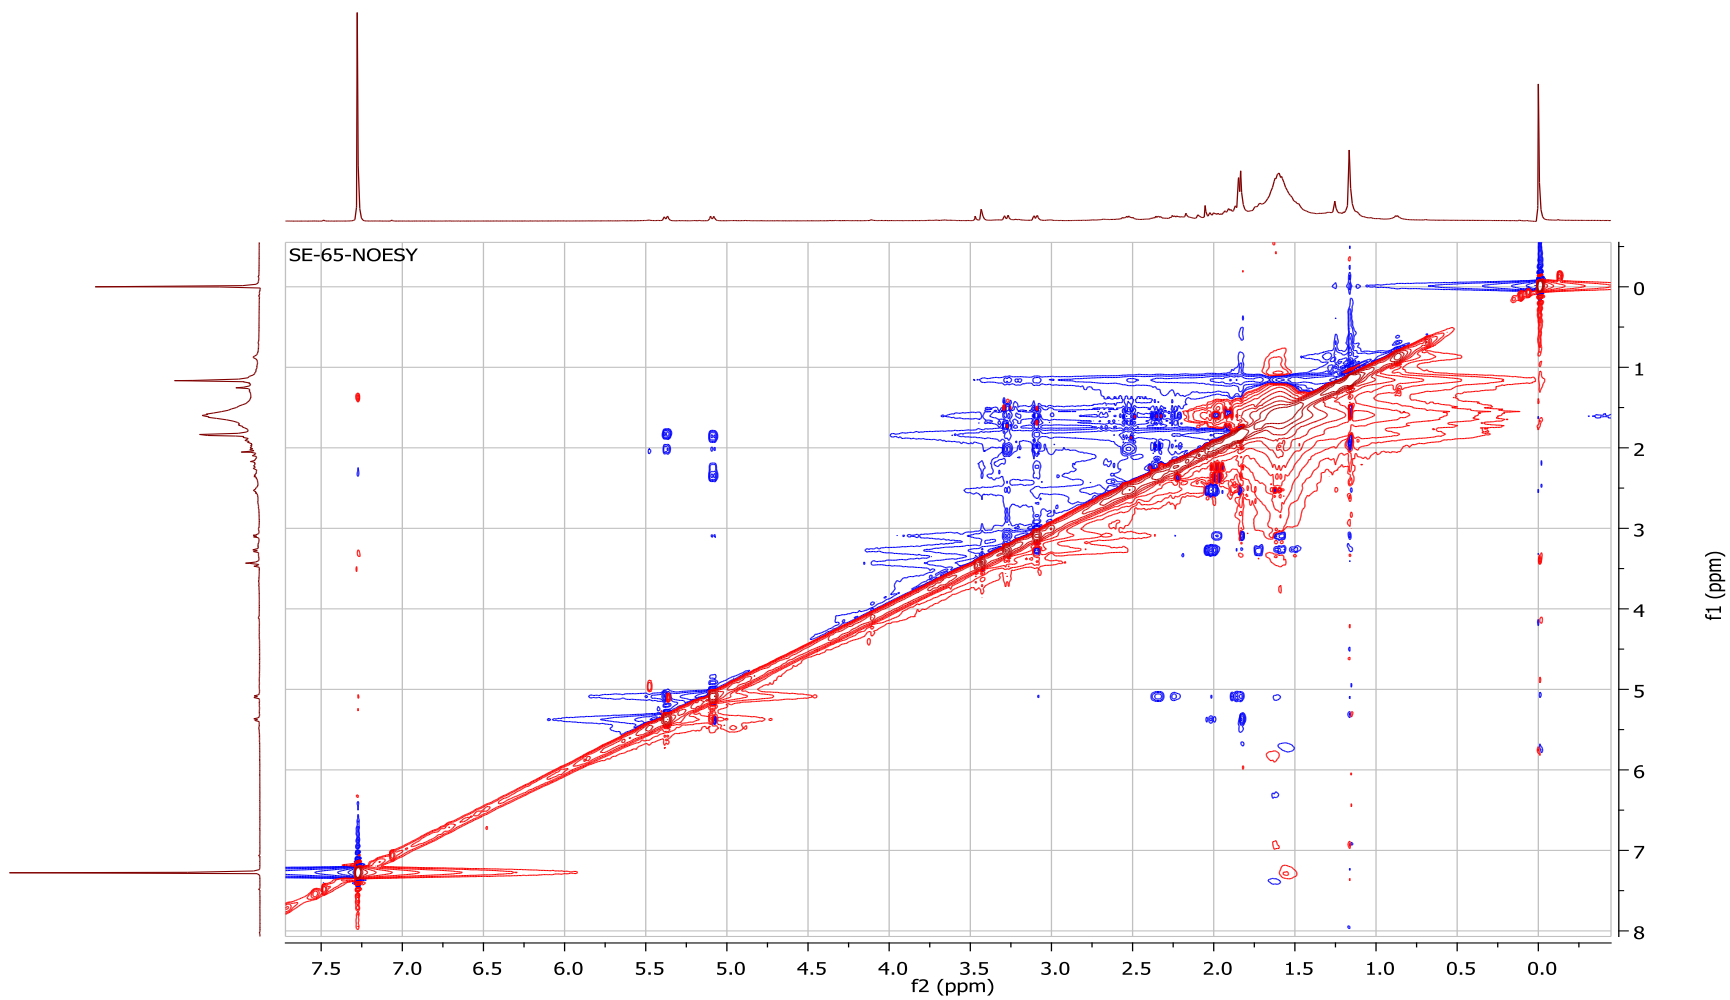

S30: NOESY of 3
